1 A global *Brassica* pest and a sympatric cryptic ally, *Plutella*  
2 *australiana* (Lepidoptera: Plutellidae), show strong divergence  
3 despite the capacity to hybridize

4 Kym D. Perry<sup>1,3</sup>, Gregory J. Baker<sup>3</sup>, Kevin J. Powis<sup>3</sup>, Joanne K. Kent<sup>3</sup>, Christopher M.  
5 Ward<sup>2</sup>, and Simon W. Baxter<sup>2</sup>

6 <sup>1</sup>*School of Agriculture, Food & Wine, University of Adelaide, Adelaide, Australia*

7 <sup>2</sup>*School of Biological Sciences, University of Adelaide, Adelaide, Australia*

8 <sup>3</sup>*South Australian Research & Development Institute, Adelaide, Australia*

9 Corresponding author: Kym D. Perry

Running title: Divergence in cryptic *Plutella* species

## 10 Abstract

11 The diamondback moth, *Plutella xylostella*, has been intensively studied due to its ability to  
12 evolve insecticide resistance and status as the world's most destructive pest of brassicaceous  
13 crops. The surprise discovery of a cryptic ally, *Plutella australiana* Landry & Hebert, with ap-  
14 parent endemism to Australia, immediately raised questions regarding the extent of ecological  
15 and genetic diversity between these two species, whether gene flow could occur, and ultimately if  
16 specific management was required. Here, we show that despite sympatric distributions and the  
17 capacity to hybridize in controlled laboratory experiments, striking differences in genetic and  
18 phenotypic traits exist that are consistent with contrasting colonization histories and reproduc-  
19 tive isolation after secondary contact. Almost 1500 *Plutella* individuals were collected from wild  
20 and cultivated brassicaceous plants at 75 locations throughout Australia. *Plutella australiana*  
21 was commonly found on all *Brassica* host types sampled except commercial vegetables, which are  
22 routinely sprayed with insecticide. Bioassays using four commonly-used insecticides found that  
23 *P. australiana* was 19-306 fold more susceptible than *P. xylostella*. Genome-wide SNPs derived  
24 from RADseq revealed substantially higher levels of genetic diversity across *P. australiana* com-  
25 pared with *P. xylostella* nuclear genomes, yet both species showed limited variation in mtDNA.  
26 Infection with a single *Wolbachia* subgroup B strain was fixed in *P. australiana*, suggesting that  
27 a selective sweep contributed to low mtDNA diversity, while a subgroup A strain infected just  
28 1.5% of *P. xylostella*. Although *P. australiana* is a potential pest of brassica crops, it is of  
29 secondary importance to *P. xylostella*.

## 30 Introduction

31 Cryptic species share morphological traits, yet can show remarkable diversity in aspects of their  
32 ecology, behaviour, and at the level of the genome. They exist across metazoan taxa (Pfen-  
33 ninger & Schwenk, 2007), including globally important arthropod pest taxa, such as white-  
34 flies (De Barro, Liu, Boykin, & Dinsdale, 2011), mosquito vectors (Coetzee et al., 2013), fruit  
35 flies (Hendrichs, Teresa Vera, De Meyer, & Clarke, 2015), thrips (Jacobson, Nault, Vargo, &  
36 Kennedy, 2016; Rugman-Jones, Hoddle, & Stouthamer, 2010) and mites (Miller et al., 2013; Sko-  
37 racka, Kuczynski, Szydlo, & Rector, 2013), some of which are characterised by cryptic species  
38 complexes. Discovering cryptic diversity has important consequences for estimates of global

39 biodiversity, conservation planning, and the management of pests and diseases. Morphologically  
40 similar species can vary in pest status due to differences in genotypic and/or phenotypic traits  
41 that influence their host range and specificity, geographic distribution, the ability to vector dis-  
42 eases, or insecticide resistance (Ashfaq et al., 2014; Miller et al., 2013; Umina, Hoffmann, &  
43 Weeks, 2004). Therefore, recognising cryptic species and the differences in their biology and  
44 ecology are essential for effective management, with important implications for public health,  
45 agriculture and trade.

46 The diamondback moth, *Plutella xylostella*, is the major pest of brassica crops worldwide,  
47 costing an estimated US\$4 to US\$5 billion annually in direct losses and management costs  
48 (Furlong, Wright, & Dossdall, 2013; Zalucki et al., 2012). Insecticide resistance is widespread in  
49 populations around the world, fuelling wide-ranging research to develop alternative management  
50 tactics (Furlong et al., 2013; Li, Feng, Liu, You, & Furlong, 2016). *Plutella xylostella* was initially  
51 recorded in Australia in the late 1800s and rapidly became a widespread pest of brassica vegeta-  
52 bles, and then canola following its expanded production from the 1990s (Endersby, McKechnie,  
53 Ridland, & Weeks, 2006; Furlong et al., 2008). Recently, Landry and Hebert (2013) through  
54 mtDNA barcoding identified a cryptic lineage of *Plutella* in Australia not detected in previous  
55 molecular studies of *P. xylostella* (Delgado & Cook, 2009; Endersby et al., 2006, 2011; Pichon et  
56 al., 2006; Roux et al., 2007; Saw, Endersby, & McKechnie, 2006). Although external morphology  
57 was indistinguishable from *P. xylostella*, deep mtDNA divergence (8.6%), differences in genital  
58 morphology and endemism in Australia led them to describe a new species, *Plutella australiana*  
59 Landry & Hebert. *Plutella australiana* was originally collected together with *P. xylostella* in  
60 light trap samples in eastern Australia, suggesting at least some ecological overlap (Landry &  
61 Hebert, 2013), but its biology, ecology and pest status were unknown.

62 The management of *P. xylostella* in Australian brassica crops has been a significant challenge  
63 for decades (Baker, 2011; Furlong et al., 2008), but the discovery of *P. australiana* has made  
64 the relative abundance and pest status of both species in these crops uncertain. With rare  
65 exception, *P. xylostella* and allied species feed on plants in the order Brassicales, mainly within  
66 the family Brassicaceae, (Landry & Hebert, 2013; Robinson & Sattler, 2001; Sarfraz, Dossdall, &  
67 Keddie, 2006), implying that the host range of *P. australiana* may include cultivated brassicas.  
68 Widespread resistance to pyrethroid and organophosphate insecticides has been attributed to  
69 Australian populations of *P. xylostella* from all vegetable and canola production regions, which

70 has led to ineffective control during outbreaks (Baker, 2011; Endersby, Ridland, & Hoffmann,  
71 2008). *Plutella xylostella* is well known as a highly migratory insect with a high capacity  
72 for gene flow (Furlong et al., 2013; Li et al., 2016), facilitating the rapid spread of resistance  
73 alleles. Australian *P. xylostella* are thought to frequently disperse, based on indirect evidence  
74 from ecological and genetic studies (Endersby et al., 2006; Furlong et al., 2008; Ridland &  
75 Endersby, 2008). Most studies have found a lack of genetic variation across microsatellite loci  
76 and mitochondrial markers among Australian and New Zealand populations of *P. xylostella*,  
77 consistent with high gene flow and/or recent ancestry (Delgado & Cook, 2009; Endersby et al.,  
78 2006; Furlong et al., 2008; Saw et al., 2006). While species identification was not in question  
79 in these studies, somewhat inconsistent findings in two studies from eastern Australia using  
80 allozymes or SSR markers (Pichon et al., 2006; Roux et al., 2007) might reflect the confounding  
81 presence of *P. australiana* samples (Landry & Hebert, 2013). With these considerations, future  
82 management of *P. xylostella* in Australian crops will require thorough understanding of the  
83 ecological requirements, genetic traits and pest status of the two *Plutella* species. Further,  
84 reproductive isolation between species is unknown but has implications for evolutionary inference  
85 and the potential for gene flow. The capacity for hybridization and introgression can lead to  
86 the exchange of insecticide resistance or other adaptive alleles (Clarkson et al., 2014; Hedrick,  
87 2013).

88 Although mtDNA markers are widely used in studies of species identity and population  
89 structure (Ashfaq & Hebert, 2016; Hebert, Penton, Burns, Janzen, & Hallwachs, 2004; Smith et  
90 al., 2012), mitochondrial variation within or between species can be influenced by direct and/or  
91 indirect selection, or introgressive hybridization (Dupont, Porco, Symondson, & Roy, 2016;  
92 Whitworth, Dawson, Magalon, & Baudry, 2007). Interpretations of population history based on  
93 mtDNA can be corroborated using independent nuclear markers and/or integrative approaches  
94 (Roe & Sperling, 2007). One factor that can confound mtDNA is interactions with inherited  
95 bacterial symbionts (Hurst & Jiggins, 2005; Ritter et al., 2013). *Wolbachia* is an extremely  
96 widespread endosymbiont thought to infect at least half of arthropod (Weinert, Araujo-Jnr,  
97 Ahmed, & Welch, 2015) and 80% of lepidoptera (Ahmed, Breinholt, & Kawahara, 2016) species.  
98 It is mainly transmitted vertically from infected females to their offspring through the egg cy-  
99 toplasm, and inheritance is therefore linked with mtDNA. To facilitate its spread, *Wolbachia*  
100 manipulates host reproductive biology to favour the fitness of infected females, by inducing host

101 phenotypes that distort sex ratios (through feminization of males, male-killing or induction of  
102 parthenogenesis) or cause sperm-egg cytoplasmic incompatibility (CI) (Engelstaedter & Hurst,  
103 2009; Werren, Baldo, & Clark, 2008). In the simple case involving a single CI-inducing strain,  
104 crosses with infected females are fertile but crosses between uninfected females and infected  
105 males fail to produce offspring. If maternal transmission is efficient and infected females have  
106 a reproductive advantage, *Wolbachia* infection can rapidly spread through insect populations  
107 (F. M. Jiggins, 2017), driving a selective sweep of a single haplotype and reducing mtDNA diver-  
108 sity (Shoemaker, Dyer, Ahrens, McAbee, & Jaenike, 2004). Very limited surveying to date has  
109 identified *Wolbachia* strains infecting *P. xylostella* at low frequency in populations from North  
110 America, Africa, Asia and Europe (Batista, Keddie, Dodsall, & Harris, 2010; Delgado & Cook,  
111 2009; Jeyaprakash & Hoy, 2000). Because symbionts can contribute to reproductive isolation  
112 and shape mtDNA diversity (Hurst & Jiggins, 2005; Telschow, Hilgenboecker, Hammerstein,  
113 & Werren, 2014), assessing their role can provide important insights into host evolution and  
114 population structure (Dumas et al., 2013; Munoz, Baxter, Linares, & Jiggins, 2011; Ritter et  
115 al., 2013; X.-J. Sun, Xiao, Cook, Feng, & Huang, 2011).

116 Here we investigated the biology, ecology and genetic structure of these cryptic populations  
117 by collecting *Plutella* from brassicaceous plants throughout Australia and screening individuals  
118 to identify mtDNA lineages and *Wolbachia* infections. For a subset of populations, we examined  
119 genetic diversity using thousands of nuclear SNPs from across the genome. In addition, we  
120 assessed reproductive compatibility in laboratory crosses and determined the susceptibility of  
121 each species to commercial insecticides.

## 122 **Materials and methods**

### 123 **Sample collection**

124 *Plutella* was collected from canola crops, *Brassica* vegetable crops, forage brassicas and wild  
125 brassicas throughout Australia between March 2014 and December 2015. The wild species  
126 included wild radish, *Raphanus raphanistrum*, turnip weed, *Rapistrum rugosum*, sea rocket,  
127 *Cakile maritima*, Ward's weed, *Carrichtera annua* and mixed stands of sand rocket, *Diplotaxis*  
128 *tenuifolia* and wall rocket, *D. muralis*. At each location, a sample of at least 25 individual larvae  
129 (rarely, eggs or pupae) were collected from randomly selected plants to achieve a representative

130 sample. Samples were collected from Brassica vegetables by hand, from sea rocket by beating  
131 plants over a collection tray, from other hosts using a sweep net. Each population sample was  
132 separately reared in ventilated plastic containers on leaves of the original host material for 1–2  
133 days and thereafter on cabbage leaves. Non-parasitised pupae or late-instar larvae were fresh  
134 frozen at  $-80^{\circ}\text{C}$ . Pupae were visually sexed under a dissecting microscope.

### 135 **DNA isolation and COI genotyping**

136 Individual pupae (but not larvae) were sexed under a dissecting microscope, then genomic DNA  
137 was isolated by homogenising whole individuals followed by two phenol and one chloroform  
138 extractions according to Zraket, Barth, Heckel, and Abbott (1990). DNA was treated with  
139 RNase A, then precipitated and re-suspended in TE buffer. *Plutella* lineages were distinguished  
140 using a PCR-RFLP assay (Perry, Pederson, & Baxter, 2017). A 707 bp COI region was amplified  
141 using a combination of two primer pairs: (i) PxCOIF (5'-TCAACAAATCATAAAGATATT-  
142 GG-3') and PxCOIR (5'-TAAACTTCAGGGTGACCAAAAAATCA-3'), and (ii) PaCOIF (5'-  
143 TCAACAAATCATAAGGATATTGG-3') and PaCOIR (5'-TAAACCTCTGGATGGCCAAA-  
144 AAATCA-3'). Ten microliter reactions were run with 2  $\mu\text{L}$  of MyTaq 5x buffer, 0.2  $\mu\text{L}$  of each  
145 primer (10 mM stocks), 1  $\mu\text{L}$  of DNA (approx. 5 ng) and 0.05  $\mu\text{L}$  of MyTaq polymerase (Bioline).  
146 Samples were amplified at  $95^{\circ}\text{C}$  for 2 minutes, then 35 cycles at  $95^{\circ}\text{C}$  for 10 seconds,  $52^{\circ}\text{C}$   
147 for 20 seconds,  $72^{\circ}\text{C}$  for 30 seconds followed by a 5 minute final extension at  $72^{\circ}\text{C}$ . PCR  
148 products were digested at  $37^{\circ}\text{C}$  for 1 hour with 1 unit of *AccI* (NEB) restriction enzyme with  
149 2  $\mu\text{L}$  Cutsmart Buffer in a 20  $\mu\text{L}$  reaction. Following digestion, products were separated using  
150 agarose gel electrophoresis (1.5%). *Plutella xylostella* products are approximately 516 bp and  
151 191 bp and *P. australiana* products are 348 bp and 359 bp. COI amplicon sequencing was  
152 performed at the Australian Genome Research Facility (AGRF). In addition, we downloaded  
153 and re-analysed sequence trace files from Landry and Hebert (2013) ([dx.doi.org/10.5883/DS-](https://dx.doi.org/10.5883/DS-PLUT1)  
154 [PLUT1](https://dx.doi.org/10.5883/DS-PLUT1)) in GENEIOUS v10.0.6 (Kearse et al., 2012). Haplotype networks were constructed using  
155 R package pegas v0.9 (Paradis, 2010).

### 156 ***Wolbachia* screening and phylogenetics**

157 *Wolbachia* infection was detected using two separate PCR assays of the 16S rRNA gene (16S-2  
158 and 16S-6) according to Simoes, Mialdea, Reiss, Sagot, and Charlat (2011). To identify *Wol-*

159 *bachia* strains, the *Wolbachia surface protein* (*wsp*) gene was sequenced for a subset of individu-  
160 als. Amplification was performed using *wsp81F* and *wsp691R* sequence primers (Zhou, Rousset,  
161 & O'Neill, 1998). Amplicons were sequenced using the reverse primer and aligned in GENEIOUS  
162 v10.0.6 (Kearse et al., 2012). We used a 493 bp alignment to construct a maximum likelihood  
163 phylogeny in RAxML v8.2.4 (Stamatakis, 2014) using a general time reversal substitution model  
164 with 1000 bootstraps.

## 165 RADseq library preparation and sequencing

166 Libraries were prepared for restriction-site-associated DNA sequencing (RADseq) according to a  
167 protocol modified from Baird et al. (2008). Genomic DNA was quantified using a Qubit 2.0 flu-  
168 orometer (Invitrogen) and 200 ng digested with 10 units of high fidelity *SbfI* in Cutsmart buffer  
169 (NEB) for 1 hour at 37 °C, then heat inactivated at 80 °C for 20 minutes. One microlitre of P1  
170 adapter (100 nM) with a 6-base molecular identifier (MID) (top strand 5'-TCGTCGGCAGCG-  
171 TCAGATGTGTATAAGAGACAGxxxxxtgca-3', bottom strand 5'-[P]xxxxxxCTGTCTCTT-  
172 ATACACATCTGACGCTGCCGACGA-3', x represents sites for MID) were then added using  
173 0.5 µL T4 DNA ligase (Promega), 1 nM ATP and Cutsmart buffer. Library pools were sheared  
174 using a Bioruptor sonicator (Diagenode), ends repaired (NEB), adenine overhangs added then P2  
175 adapters (top strand 5'-[P]CTGTCTCTTATACACATCTCCAGAATAG-3', bottom strand 5'-  
176 GTCTCGTGGGCTCGGAGATGTGTATAAGAGACAGT-3') ligated. DNA purification be-  
177 tween steps was performed using a MinElute PCR purification kit (Qiagen). Libraries were  
178 amplified using KAPA HiFi Hotstart Readymix (Kapa Biosystems) and Nextera i7 and i5 in-  
179 dexed primers with PCR conditions: 95 °C for 3 minutes, two cycles of 98 °C for 20 seconds,  
180 54 °C for 15 seconds, 72 °C for 1 minute, then 15 cycles of 98 °C for 20 seconds, 65 °C for 15  
181 seconds, 72 °C for 1 minute followed by a final extension of 72 °C for 5 minutes. Libraries were  
182 size-selected (300-700 bp) on agarose gel and purified using a minElute Gel Extraction Kit (Qi-  
183 agen), then Illumina paired-end sequencing performed using HiSeq2500 (100 bp) or NextSeq500  
184 (75 bp) at the AGRF.

## 185 Read filtering and variant calling

186 Sequence reads were demultiplexed using RADTOOLS v1.2.4 (Baxter et al., 2011) allowing one  
187 base MID mismatch, then TRIMMOMATIC v0.32 (Bolger, Lohse, & Usadel, 2014) used to re-

188 move restriction sites, adapter sequences, a thymine base from reverse reads introduced by the  
189 P2 adapter, and quality filter using the ILLUMINACLIP tool with parameters: TRAILING:10 SLID-  
190 INGWINDOW:4:15 MINLEN:40. Paired reads were aligned to the *P. xylostella* reference genome  
191 (accession number: GCF\_000330985.1) using STAMPY v1.0.21 (Lunter & Goodson, 2011) with  
192 --baq and --gatkcgicigarworkaround options and expected substitution rate set to 0.03 for *P.*  
193 *xylostella* and 0.05 for *P. australiana*. Duplicate reads were removed using PICARD v1.71  
194 (<http://broadinstitute.github.io/picard/>). Genotypes were called using the GENOME ANALY-  
195 SIS TOOL KIT v3.3-0 (DePristo et al., 2011; McKenna et al., 2010) HAPLOTYPECALLER tool.  
196 We determined that base quality score recalibration using bootstrapped SNP databases was in-  
197 appropriate for this dataset as it globally reduced quality scores. For downstream comparisons  
198 between species, we joint-genotyped *P. australiana* and *P. xylostella* individuals using the geno-  
199 typeGVCFs workflow. To examine finer scale population structure, we also joint-genotyped the  
200 *P. australiana* individuals alone. All variant callsets were hard-filtered with identical parameters  
201 using VCFTOOLS v0.1.12A Danecek et al. (2011): We removed indels and retained confidently  
202 called biallelic SNPs ( $GQ \geq 30$ ) genotyped in at least 70% of individuals with a minimum geno-  
203 type depth of 5,  $\text{minQ} \geq 400$ , average site depth of 12–100, minimum minor allele frequency of  
204 0.05, in Hardy-Weinberg equilibrium at  $\alpha = 0.05$ , retaining SNPs separated by a minimum  
205 of 2000 bp using the VCFTOOLS --thin function. To estimate genetic diversity, we generated a  
206 set of confidently called ( $GQ \geq 30$ ) variant and invariant sites, and hard filtered to remove sites  
207 within repetitive regions and retain sites genotyped in at least 70% of individuals with average  
208 site depth of 12–100.

## 209 Genetic diversity and population structure

210 Genetic diversity was calculated for *Plutella* populations of both species from five locations. The  
211 R package hierfstat (Goudet & Jombart, 2015) was used to calculate observed heterozygosity,  
212 gene diversity and the inbreeding coefficient,  $F_{IS}$ , according to Nei (1987). Population means  
213 for site depth and number of SNPs, indels and private sites were calculated using the --depth  
214 function and vcfstats module in VCFTOOLS v0.1.12a (Danecek et al., 2011). Levels of heterozy-  
215 gosity sites within individuals were determined from all confidently called sites excluding indels  
216 using a custom python script parseVCF.py (<https://github.com/simonhmartin>) and visualised  
217 using R (R Core Team, 2017).



218 To examine population structure in *P. australiana*, a global estimate of  $F_{ST}$  (Weir & Cock-  
219 erham, 1984) with bootstrapped 99% confidence intervals ( $10^4$  bootstraps) was calculated in R  
220 package *diveRsity* (Keenan, McGinnity, Cross, Crozier, & Prodoehl, 2013). Pairwise  $F_{ST}$  values  
221 for all population pairs were calculated and significance determined using exact  $G$  tests ( $10^4$   
222 mc burnins,  $10^3$  batches, and  $10^4$  iterations per batch) in GENEPOP v4.6 (Rousset, 2008) after  
223 bonferroni correction for multiple comparisons.

224 Separate analysis of population structure was performed using the Bayesian clustering pro-  
225 gram STRUCTURE v2.3.4 (Pritchard, Stephens, & Donnelly, 2000), first for all individuals of  
226 co-occurring *Plutella* species, and second for *P. australiana* alone. For all runs, we used  $5 \times 10^5$   
227 burnins and  $10^6$  MCMC replicates and performed ten independent runs for each  $K$  value from  
228 1 to 10, where  $K$  is the number of genotypic clusters, using a different random seed for each  
229 run, assuming the locprior model with correlated allele frequencies and  $\lambda$  set to 1. The opti-  
230 mal value of  $K$  was determined using the delta $K$  method (Evanno, Regnaut, & Goudet, 2005)  
231 implemented in STRUCTURE HARVESTER (Earl & vonHoldt, 2012) and inspection of the likeli-  
232 hood distribution for each model.  $Q$ -matrices were aligned across runs using CLUMPP v1.1.2  
233 (Jakobsson & Rosenberg, 2007) and visualised using DISTRUCT v1.1 (Rosenberg, 2004).

### 234 **Laboratory cultures of *Plutella* species**

235 Laboratory cultures of *P. australiana* and *P. xylostella* were established from field populations  
236 and used for crossing experiments and insecticide bioassays. *Plutella* adults were collected at  
237 light traps at Angle Vale and Urrbrae, South Australia, in October–November 2015. Females  
238 were isolated and allowed to lay eggs, then identified using PCR-RFLP and progeny pooled  
239 to produce separate cultures of each species. A laboratory culture of the Waite Susceptible  
240 *P. xylostella* strain (S) has been maintained on cabbage without insecticide exposure for ap-  
241 proximately 24 years ( $\approx 305$  generations). All cultures were maintained in laboratory cages at  
242  $26 \pm 2.0^\circ\text{C}$  and a 14:10 (L:D) hour photoperiod at the South Australian Research and Devel-  
243 opment Institute, Waite Campus, Adelaide, South Australia. The *P. australiana* culture was  
244 maintained on sand rocket, *Diplotaxis tenuifolia* L., and the *P. xylostella* culture maintained on  
245 cabbage, *Brassica oleracea* L. var. *capitata*. The purity of cultures was assessed regularly using  
246 PCR-RFLP.

## 247 **Crossing experiments**

248 *Plutella australiana* and *P. xylostella* pupae were sexed under a stereo microscope, then placed  
249 into individual 5 mL clear polystyrene tubes with fine mesh lids and gender visually confirmed  
250 after eclosion. Enclosures used for crossing experiments were 850 mL polypropylene pots (Bon-  
251 son Pty Ltd) modified with lateral holes covered with voile mesh for ventilation. Crosses of single  
252 mating pairs were performed on laboratory benches at  $26 \pm 2.0^\circ\text{C}$  and 14:10 (L:D) photoperiod  
253 using 3-week old *D. tenuifolia* seedlings as the host plant. After seven days, adults were col-  
254 lected into a 1.5 mL tube and fresh frozen at  $-80^\circ\text{C}$  for species confirmation using PCR-RFLP.  
255 Seedlings were examined and eggs counted under a stereo microscope, then returned to enclo-  
256 sures to allow egg hatch. Larvae were provided with fresh 3–4 week old seedlings until pupation,  
257 then pupae were individually collected into 5 mL tubes. Hybrid F1xF1 crosses and back-crosses  
258 were then performed as above. The presence of egg and adult offspring was recorded for all  
259 replicates, and for the majority of replicates ( $> 80\%$ ), the numbers of offspring were counted  
260 and used to calculate a mean.

## 261 **Insecticide bioassays**

262 Insecticide susceptibility of field-collected *Plutella* strains was compared to the susceptible *P.*  
263 *xylostella* (S) reference in dose-response assays using four commercial insecticides: Dominex  
264 ( $100\text{ g L}^{-1}$  alpha-cypermethrin), Proclaim ( $44\text{ g kg}^{-1}$  emamectin benzoate), Coragen ( $200\text{ g L}^{-1}$   
265 chlorantraniliprole) and Success Neo ( $120\text{ g L}^{-1}$  spinetoram). Bioassays were performed by plac-  
266 ing 3<sup>rd</sup> instar larvae onto inverted leaf discs embedded in 1% agar in 90mm Petri dishes. Cabbage  
267 leaves, *Brassica oleracea* L. var. *capitata* were used for *P. xylostella* and canola leaves, *B. napus*  
268 L. var. 'ATR Stingray' were used for *P. australiana*. Eight concentrations and a water-only  
269 control were evaluated for each insecticide using four replicates of ten larvae. A 4 mL aliquot of  
270 test solution was applied directly to leaves using a Potter Spray Tower (Burkard Manufacturing  
271 Co. Ltd.) calibrated to deliver an aliquot of  $3.52 \pm 0.09\text{ mg cm}^{-2}$ . After application, each dish  
272 was placed in a controlled temperature room at  $25 \pm 0.5^\circ\text{C}$ , then mortality assessed after 48  
273 hours (Dominex, Success Neo) or 72 hours (Proclaim, Coragen). Dose-response analysis was  
274 performed using log-logistic regression in R package drc (Ritz, Baty, Streibig, & Gerhard, 2015),  
275 and the fitted models were used to estimate the lethal concentration predicted to cause 50 %

276 ( $LC_{50}$ ) and 99% ( $LC_{99}$ ) mortality of the test population with 95%. Resistance ratios were  
277 calculated by dividing the  $LC_{50}$  and  $LC_{99}$  estimates for field strains by the corresponding  $LC$   
278 estimates for the *P. xylostella* (S) reference. In addition, we calculated a ratio of the commercial  
279 field concentration with the  $LC_{99}$  estimates, based on the field application rates of each insecti-  
280 cide registered for use against *P. xylostella* in Australian brassica vegetable crops: 40 mg ha<sup>-1</sup>  
281 a.i. (Dominex), 13.2 mg ha<sup>-1</sup> a.i. (Proclaim), 20 mg ha<sup>-1</sup> a.i. (Coragen) and 48 mg ha<sup>-1</sup> a.i.  
282 (Success Neo).

## 283 Results

### 284 Geographic distribution and host association of *Plutella* species

285 *Plutella* larvae were collected from brassica plants at 75 locations in Australia and 1477 indi-  
286 viduals were genotyped at the COI locus using PCR-RFLP to identify species. Of these, 88%  
287 (n=1300) were genotyped as *P. xylostella*, 10% (n=147) as *P. australiana*, and 2% (n=30) were  
288 unresolved (Table 1). *Plutella australiana* was identified in around one quarter (n=20/75) of  
289 collections distributed across southern Australia, while *P. xylostella* occurred at all locations  
290 except Cunnamulla, Queensland, in a collection from wild African mustard, *Brassica tourne-*  
291 *fortii* (Table 1). The sex ratio was not different from 1:1 for *P. xylostella* (481 females, 517  
292 males,  $\chi^2=1.2986$ ,  $p=0.2545$ ) or *P. australiana* (63 females, 55 males,  $\chi^2=0.5424$ ,  $p=0.4615$ ).  
293 The relative incidence and abundance of *P. australiana* was >2-fold higher in the eastern state  
294 of New South Wales than in other states (Table 2, Figure 1). *Plutella australiana* larvae were  
295 detected in 29% (n=5/17) of collections from wild species, including wild radish, *Raphanus*  
296 *raphanistrum*, wild turnip, *Rapistrum rugosum* and mixed stands of sand rocket, *D. tenuifolia*  
297 and wall rocket, *D. muralis*. Among cultivated crops, *P. australiana* larvae occurred in 36%  
298 (n=14/39) of samples from canola, consisting of 11% of total *Plutella* individuals, but were not  
299 identified from commercial brassica vegetable farms (Table 2). However, *P. australiana* eggs  
300 were collected from kale on one farm.

### 301 *Wolbachia* infections

302 *Plutella* individuals (n=1447) were screened for *Wolbachia* infection using 16S rRNA PCR as-  
303 says. Only 1.5% (n=19/1300) of *P. xylostella* collected from eight different locations were

304 infected (Table 1). In contrast, all 147 *P. australiana* individuals were infected with *Wolbachia*  
305 across the 20 locations where this species occurred. To identify *Wolbachia* strains, a *Wolbachia*  
306 *surface protein* (*wsp*) amplicon was sequenced from 14 *P. xylostella* and 30 *P. australiana* in-  
307 dividuals . Each species was infected with a different strain. The *wsp* sequence for Australian  
308 *P. xylostella* showed 100% identity to a *Wolbachia* supergroup A isolate infecting *P. xylostella*  
309 from Malaysia, *plutWA1* (Delgado & Cook, 2009). For *P. australiana*, the *wsp* sequence showed  
310 100% identity to to a *Wolbachia* supergroup B isolate infecting a mosquito, *Culex pipiens*, from  
311 Turkey and the winter moth, *Operophtera brumata*, from the Netherlands (Figure 2).

### 312 **Crossing experiments**

313 Inter-species single pair mating experiments showed that hybridization between *P. australiana*  
314 and *P. xylostella* was possible, yet less successful than intra-species crosses. While most intra-  
315 species crosses produced adult offspring, the fecundity of *P. xylostella* was >2-fold higher than  
316 for *P. australiana* (Table 6). Both reciprocal inter-species crosses produced F1 adult offspring,  
317 but success was asymmetric and notably higher in the pairs with *P. australiana* females. In  
318 this direction, there was a strong male bias in the F1 progeny: from 76 cross replicates, 16  
319 collectively produced 9 female and 80 male adults, a ratio of 8.9. Hybrid F1xF1 crosses for  
320 both parental lines produced F2 adult offspring. For the *P. australiana* maternal line, parental  
321 back-crosses using F1 hybrid males successfully produced offspring, while parental back-crosses  
322 with F1 hybrid females were sterile. For the *P. xylostella* maternal line, low fitness allowed only  
323 a single parental back-cross replicate, which involved a hybrid female and was sterile.

### 324 **Mitochondrial haplotype diversity**

325 Mitochondrial haplotype networks of Australian *Plutella* were constructed using a 613 bp COI  
326 alignment that included 81 sequences from this study and 108 from Landry and Hebert (2013).  
327 We found low haplotype diversity within Australian *P. xylostella*, consistent with previous re-  
328 ports (Delgado & Cook, 2009; Juric, Salzburger, & Balmer, 2017; Saw et al., 2006). Only five  
329 haplotypes were identified among 102 individuals, including three identified by Saw et al. (2006)  
330 and three of which occurred in single individuals. The most common haplotype, PxCOI01, oc-  
331 curred at high frequency and differed by a single base from other haplotypes (Figure 5a, Table  
332 S1). Similarly, nine closely related haplotypes were identified in 87 *P. australiana* individuals,

333 with seven occurring in single individuals (Figure 5B). The most common haplotype, PaCOI01,  
334 occurred at high frequency and differed by 1-2 bases from other haplotypes (Figure 5b, Table  
335 S2).

## 336 Nuclear diversity and population structure

337 At five collection locations, *P. australiana* co-occurred with *P. xylostella* in sufficient numbers to  
338 enable comparison of nuclear genomes, though the relative abundance of species varied between  
339 locations. To ensure representation from the south-west region of Australia, the Esperance  
340 population (n=5) was formed by including one *P. australiana* individual from Boyup Brook.  
341 Despite only two *P. xylostella* individuals at Gilgandra, this population had 17 *P. australiana*  
342 individuals and was included. To generate nuclear markers, we performed RADseq for a total  
343 of 54 *P. australiana* and 48 *P. xylostella* individuals.

344 Illumina sequencing and demultiplexing using RADTOOLS (Baxter et al., 2011) yielded 282.7  
345 million raw sequence reads. Two *P. australiana* individuals with low sequencing depth were  
346 excluded. Following read quality filtering and mapping, genotypes were called for 100 individuals  
347 from both species. Hard filtering retained 305 136 confidently called variant and invariant sites  
348 at a mean depth >36 per individual, and a subset of 707 widely-dispersed SNP variants (to  
349 avoid linkage bias), for comparative analyses of genetic diversity and population structure.

350 Analysis of nuclear diversity across 305 136 sites revealed a striking contrast between species,  
351 with notably higher diversity in populations of *P. australiana* than co-occurring populations of  
352 *P. xylostella* (Table 3). The mean observed heterozygosity within populations ranged from  
353 0.13–0.16 for *P. australiana* and 0.009–0.010 for *P. xylostella*. Similarly, the average numbers  
354 of SNPs, indels and private alleles were considerably higher within *P. australiana* populations.  
355 As *P. australiana* may have fixed nucleotide differences relative to the *P. xylostella* reference  
356 genome that may affect population level statistics, we also removed indels from this dataset and  
357 directly compared the heterozygosity among individuals using 293 372 sites. This showed that  
358 *P. australiana* individuals had on average a >1.5-fold higher proportion of heterozygous sites  
359 than *P. xylostella* individuals (Figure 3).

360 Genetic structure was investigated using 707 nuclear SNPs for co-occurring populations of  
361 each species with the Bayesian clustering program STRUCTURE. The delta*K* method predicted  
362 a strong optimal at  $K = 2$  genotypic clusters. *Plutella australiana* and *P. xylostella* individuals

363 were clearly separated into distinct genotypic clusters in accordance to their mtDNA genotypes  
364 regardless of geographic location (Figure 4, left panel). A small degree of admixture can be seen  
365 for some individuals, as shown by sharing of coloured bars.

366 Assessing population structure from datasets with multiple species can mask hierarchical  
367 structure (Kalinowski, 2011). To address this, genotypes were separately called for 52 *P. aus-*  
368 *traliana* individuals, and hard filtering retained a set of 976 widely-dispersed SNP variants at a  
369 mean depth >32 per individual for examination of finer scale structure among five populations.  
370 The  $\Delta K$  method predicted a weak modal signal at  $K=3$ , but the highest likelihood value  
371 occurred at  $K=1$ . Bar plots for  $K=2-4$  showed a high degree of admixture among individuals  
372 across the five populations, consistent with high levels of gene flow across Australia (Figure 4,  
373 right panel). Pairwise  $F_{ST}$  was then calculated for the five *P. australiana* populations using 976  
374 SNPs. The global estimate was not significantly different from zero, indicating the populations  
375 are not differentiated ( $F_{ST} = 0.0012$ , 99 % CI=0.0255–0.0403). Further, pairwise  $F_{ST}$  values  
376 were low, ranging from -0.0033 to 0.0051, suggesting substantial gene flow among populations  
377 separated by distances between 341–2700 kilometres (Table 4).

### 378 **Insecticide susceptibility**

379 Bioassays revealed highly contrasting responses to insecticide exposure in *P. xylostella* and *P.*  
380 *australiana* field strains (Figure 6). *Plutella australiana* showed extremely high susceptibility  
381 to all four insecticides evaluated: resistance ratios at the  $LC_{50}$  and  $LC_{99}$  estimates were less  
382 than 1.0, indicating that this strain was 1.5-fold to 7.4-fold more susceptible even than the  
383 laboratory *P. xylostella* (S) reference. In contrast, resistance ratios at the  $LC_{50}$  for the field  
384 *P. xylostella* strain ranged from 2.9 for Success Neo to 41.4 for Dominex (Table 5), indicating  
385 increased tolerance to all insecticides. The ratio of commercial field doses to  $LC_{99}$  estimates for  
386 each insecticide implied differences in field control between species. The field dose ratios for *P.*  
387 *xylostella* were between 0.1 for Dominex, indicating that a commercial dose of Dominex would  
388 fail to control this field strain, to 14.7 for Success Neo, and for *P. australiana* were between 17.7  
389 for Dominex to 474.6 for Success Neo. Control mortality was similar for the field and reference  
390 strains, averaging 3.1% to 4.4% across all bioassays.

## 391 Discussion

392 Cryptic species arise when divergence does not lead to morphological change (Bickford et al.,  
393 2007). The recent discovery of a cryptic ally to the diamondback moth, *P. australiana*, was  
394 unexpected given the breadth of previous genetic studies on this economically important pest.  
395 Several factors may have contributed to this discovery, including the use of light traps for spec-  
396 imen collection, rather than limiting sampling to *Brassica* vegetable farms. Landry and Hebert  
397 (2013) also isolated DNA from legs, keeping most of each specimen intact and providing a mor-  
398 phological reference for examining unexpected genotypes. It is also possible that *P. australiana*  
399 was previously overlooked from nuclear DNA studies due to biases in amplification of divergent  
400 alleles. Here we sought to determine whether *P. australiana* is an agricultural pest, and to  
401 understand its ecological and genetic differences from *P. xylostella*.

402 Extensive larval sampling from wild and cultivated brassicaceous plants revealed that *P.*  
403 *australiana* widely co-occurs with *P. xylostella* throughout southern Australia, and utilizes some  
404 of the same host plants. The relative abundance of *P. australiana* was on average 9-fold lower  
405 than *P. xylostella*. We observed higher proportions of *P. australiana* in larval collections from  
406 the eastern state of New South Wales, similar to the light trap samples from Landry and Hebert  
407 (2013), possibly reflecting habitat suitability. Although we did not detect *P. australiana* in  
408 limited sampling from the island state of Tasmania, the presence of brassicas in the region and  
409 evidence from light traps that wind currents can transport *Plutella* moths across Bass Strait  
410 (Lionel Hill, Pers. Comm.) suggest it is likely to occur there.

411 Our study confirms that the host range of *P. australiana* includes canola crops and wild  
412 brassicaceous species. In laboratory rearing, *P. australiana* completed development on sand  
413 rocket, *D. tenuifolia*, and canola, *Brassica napus*, and was additionally collected from several  
414 other wild species without rearing to confirm host status. Our sampling focused on relatively few  
415 introduced brassicaceous species common in agricultural areas, yet the Australian Brassicales  
416 is represented by 11 plant families (Australasian Virtual Herbarium, <https://avh.chah.org.au/>).  
417 These include several families outside the Brassicaceae on which *P. xylostella* and allies have been  
418 documented feeding, including Capparaceae (Robinson & Sattler, 2001), Cleomaceae (Landry &  
419 Hebert, 2013) and Tropaeolaceae (Sarfraz et al., 2006). The Australian Brassicaceae has records  
420 for 61 genera and 205 species, including many introduced species but also a diversity of native

421 genera, such as *Lepidium*, *Blennodium*, and *Arabidella*, that occur over vast areas of Australia.  
422 As *P. australiana* is apparently native, wider sampling of native Brassicales may identify other  
423 suitable hosts.

424 *Plutella australiana* larvae were not identified among samples from sixteen commercial bras-  
425 sica vegetable crops despite the high suitability of these crops for *P. xylostella* (Talekar &  
426 Shelton, 1993), however eggs were collected from Kale. It is possible that extreme insecticide  
427 susceptibility prevents juvenile *P. australiana* populations from establishing, as commercial veg-  
428 etable crops are typically sprayed multiple times per crop cycle (Baker, 2011). Comparison of  
429 commercial field rates against  $LC_{99}$  estimates for the four evaluated insecticides suggest the  
430 likelihood of poor or marginal field control for some insecticides against *P. xylostella*, consistent  
431 with known levels of resistance (Baker, 2011; Endersby et al., 2008), but very high field control  
432 if the same rates were used against *P. australiana*. Alternatively, some vegetable cultivars may  
433 not be attractive for oviposition or suitable for larval survival in this species. Exposure to host  
434 plants stimulates reproductive behaviour in *P. xylostella* (Pivnick, Jarvis, Gillott, Slater, & Un-  
435 derhill, 1990). We noted that *P. australiana* cultures provided with cabbage seedlings failed to  
436 produce viable eggs over seven days, but after then replacing cabbage with *Diplotaxis* seedlings,  
437 egg-laying occurred within 24 hours. Olfactory cues for host recognition or oviposition (Justus  
438 & Mitchell, 1996; Renwick, Haribal, Gouinguene, & Stadler, 2006; J. Y. Sun, Sonderby, Halkier,  
439 Jander, & de Vos, 2009) may differ between *Plutella* species. Host preference and performance  
440 studies are required to test these hypotheses.

441 Insecticide bioassays have been routinely conducted on Australian *P. xylostella* to monitor  
442 levels of insecticide resistance in field populations (Baker, 2011; Endersby et al., 2008). This  
443 method appears unlikely to be affected by the presence of *P. australiana* under typical conditions,  
444 as a period of laboratory rearing is usually necessary to multiply individuals prior to screening.  
445 In our experience, laboratory rearing of the two *Plutella* species on cabbage plants selects against  
446 *P. australiana* individuals when competing with *P. xylostella* in cages, causing the complete loss  
447 of *P. australiana* within a few generations. The reasons for this are unknown but may include  
448 differences in host preference or development rate, or direct competition.

449 Crossing experiments revealed that hybridization can occur between *P. australiana* and *P.*  
450 *xylostella* under controlled conditions and is most likely to occur in crosses involving *Wol-*  
451 *bachia*-infected *P. australiana* females. Hybridization occurs in around 10% of animal species,



452 particularly in captivity (Mallet, 2005), but asymmetric reproductive isolation is commonly ob-  
453 served in reciprocal crosses between taxa (Turelli & Moyle, 2007). In our experiments, a strong  
454 male bias in the offspring of interspecific crosses and failure to back-cross hybrid females both  
455 follow Haldane's rule (Haldane, 1922), which predicts greater hybrid inviability or sterility in the  
456 heterogametic sex (female, in Lepidoptera). This pattern can arise from epistatic interactions  
457 between sex-linked and/or autosomal genes that result in genetic incompatibilities (C. Jiggins et  
458 al., 2001; Turelli & Orr, 2000). Although the back-crosses with F1 hybrid females were sterile,  
459 the back-crosses with hybrid males (to both species) were viable, which could enable the transfer  
460 of genes between hybrid and/or parental species. However, it is unclear whether hybridization  
461 occurs in the wild.

462 Although *P. australiana* and *P. xylostella* show deep divergence (8.6%) in mtDNA (Landry  
463 & Hebert, 2013), the sole use of mtDNA can be unreliable for inference of evolutionary history  
464 and should be corroborated using evidence from nuclear markers (Hurst & Jiggins, 2005). Our  
465 analysis revealed striking differences in nuclear diversity across the genome between co-existing  
466 populations of each *Plutella* species collected at the same locations and times, and from the  
467 same host plant species. *Plutella xylostella* populations from Australia and New Zealand have  
468 low levels of genetic diversity compared with populations from other continents, thought to  
469 reflect the recent introduction of this species from a small founding population (Endersby et al.,  
470 2006; Saw et al., 2006). Consistent with this view, we found a remarkable 1.5-fold reduction  
471 in heterozygosity across >300 000 sites in *P. xylostella* compared with sympatric *P. australiana*  
472 populations. However, both species showed limited mtDNA diversity with a single haplotype  
473 predominant. While outgroups from other continents were not available, comparative analysis  
474 of these closely-related Australian *Plutella* species suggested that patterns of mitochondrial and  
475 nuclear diversity are concordant in *P. xylostella* and consistent with a demographic bottleneck  
476 (Delgado & Cook, 2009; Saw et al., 2006), but discordant in *P. australiana*.

477 Mitochondrial variation can be strongly influenced by *Wolbachia* infection (Shoemaker et  
478 al., 2004). Extensive *Wolbachia* screening showed that each *Plutella* species was infected with  
479 a different strain at contrasting frequencies, and fit a 'most-or-few' pattern whereby species  
480 infection rates are often very low (<10%) or very high (>90%) (Hilgenboecker, Hammerstein,  
481 Schlattmann, Telschow, & Werren, 2008). Infection incidence in *P. xylostella* was lower in  
482 Australia (1%) than previously reported across global samples (5%) (Delgado & Cook, 2009).

483 Our finding of a single supergroup A strain showing 100% sequence similarity to a strain reported  
484 in *P. xylostella* from Malaysia, *plutWA1* (Delgado & Cook, 2009), provides some support of an  
485 Asian origin for Australian *P. xylostella* (Saw et al., 2006), though does not preclude this strain  
486 also occurring elsewhere.

487 Fixation of infection in *P. australiana* suggests that *Wolbachia* manipulates the reproductive  
488 biology of this species, though the host phenotype is unknown. We found no evidence of sex-  
489 ratio distortion, which has been associated with a *Wolbachia* strain, *plutWB1*, in *P. xylostella*  
490 (Delgado & Cook, 2009). High infection can be driven by cytoplasmic incompatibility (CI)  
491 (F. M. Jiggins, 2017). The high frequency of a single mtDNA haplotype among *P. australiana*  
492 individuals (87%) implies that the spread of *Wolbachia* infection has driven a selective sweep of  
493 co-inherited mtDNA through the population, causing a loss of mtDNA diversity (Shoemaker et  
494 al., 2004). High nuclear diversity (relative to sympatric *P. xylostella*) supports this hypothesis,  
495 because a demographic bottleneck should reduce diversity across the entire genome (Hurst &  
496 Jiggins, 2005). We found that *P. australiana* was infected with a supergroup B strain also  
497 reported to infect a mosquito, *Culex pipiens*, and a moth, *Operophtera brumata* (Derks et al.,  
498 2015; Havill et al., 2017). *Wolbachia* and host species often show incongruent phylogenies due to  
499 horizontal transfer of infections between taxa (Werren et al., 2008). Even closely related species  
500 often have different *Wolbachia* strains, demonstrating that most infections do not survive host  
501 speciation (Werren et al., 2008).

502 *Plutella australiana* and *P. xylostella* have co-existed in Australia for at least 125 years  
503 ( $\geq 1300$  generations), yet have strongly divergent mitochondrial and nuclear genomes, *Wol-*  
504 *bachia* infections and insecticide susceptibility phenotypes. Laboratory rearing and crossing  
505 experiments also suggested that interspecific differences in host plant use may exist. What ex-  
506 plains such strong divergence between the two *Plutella* species, given sympatry and the capacity  
507 to hybridize? Endemism of *P. australiana* (Landry & Hebert, 2013) implies an ancient evolu-  
508 tionary history in Australia, and our data provide support for existing views that Australian  
509 *P. xylostella* were recently introduced from a small ancestral source population, possibly from  
510 Asia (Delgado & Cook, 2009; Juric et al., 2017; Saw et al., 2006). Therefore, the two *Plutella*  
511 species may have diverged in allopatry and recently come into secondary contact. Maintenance  
512 of divergence suggests strong continuing reproductive isolation, which can evolve as a side-effect  
513 of allopatric divergence (Telschow et al., 2014). All 100 individuals that were RAD sequenced

514 showed concordance in nuclear multilocus genotypes and mtDNA genotypes identified through  
515 PCR-RFLP regardless of geographic location, as shown by STRUCTURE analysis. Cryptic species  
516 in sympatry provides strong evidence of limited genetic exchange (Bickford et al., 2007). A small  
517 degree of genotypic admixture evident for a few individuals in the STRUCTURE plots might be  
518 explained by ancestral polymorphism or some introgressive hybridization (Hedrick, 2013), or  
519 alternatively, could be an artefact if the dataset is not representative of the entire genetic back-  
520 ground (Dupont et al., 2016). The level of hybridization that may be occurring between these  
521 species is unknown. Reproductive isolation may not be uniform across the genome (Harrison &  
522 Larson, 2014, 2016), and scans of larger genomic regions may be required to identify introgression  
523 and detect hybrids.

524 The factors leading to reproductive isolation between the two *Plutella* species in nature are  
525 unknown but could include a range of pre- or post-mating isolation mechanisms, such as as-  
526 sortive mating or hybrid fitness costs. Behavioural mating choices are often the main isolating  
527 factor in sympatric animals (Mallet, 2005). Does *Wolbachia* cause a reproductive barrier? The  
528 contrast in infection status creates the potential for cytoplasmic incompatibility between species  
529 (Jaenike, Dyer, Cornish, & Minhas, 2006). Interspecific crosses showed a pattern of asym-  
530 metric isolation consistent with the expected effects of unidirectional CI, where 21% crosses  
531 involving infected *P. australiana* females produced viable offspring, while the reciprocal CI-  
532 cross direction (uninfected *P. xylostella* males crossed with infected *P. australiana* males) was  
533 nearly sterile. However, this pattern was not continued in the F1 generation: infected hybrid  
534 males (derived from the *P. australiana* maternal line) produced offspring at comparable rates  
535 when back-crossed to either uninfected *P. xylostella* or infected *P. australiana* female parents.  
536 The role of *Wolbachia*-induced postzygotic isolation between the two *Plutella* species requires  
537 further study, however our results suggest it could be more important in the F0 generation.  
538 *Wolbachia* can contribute to post-zygotic genetic isolation after speciation by complementing  
539 hybrid incompatibilities (Gebiola, Kelly, Hammerstein, Giorgini, & Hunter, 2016; Jaenike et al.,  
540 2006). Symbiont infections could also influence mating behaviour and contribute to pre-mating  
541 isolation (Shropshire & Bordenstein, 2016).

## 542 Conclusions

543 The discovery of cryptic pest species introduces complexities for their management and also  
544 exciting opportunities for understanding ecological traits. We found strong genomic and pheno-  
545 typic divergence in two cryptic *Plutella* lineages co-existing in nature, supporting their status  
546 as distinct species (Landry & Hebert, 2013), despite their capacity to hybridize. Reproductive  
547 isolation is likely to have evolved during allopatric speciation, and genome-wide sequence data  
548 suggest it has been maintained following secondary contact. Variation in *Wolbachia* infections  
549 might be one factor reinforcing reproductive barriers.

550 *Plutella australiana* co-occurs with *P. xylostella* throughout agricultural regions of southern  
551 Australia, but made up only 10% of *Plutella* juveniles collected from cultivated and wild bras-  
552 sicaceous plants. A lack of population structure across neutral SNP markers suggests that *P.*  
553 *australiana* populations are linked by high levels of gene flow, which is supported by light trap  
554 collections (Landry & Hebert, 2013) and seasonal colonization of canola crops. Future molecu-  
555 lar analysis of Australian *Plutella* should include a species identification step using PCR-RFLP.  
556 For ecological studies, it may be possible to perform molecular species identification to confi-  
557 dently distinguish a representative sub-sample of individuals or pooled samples. Our study has  
558 shown that while *P. australiana* can attack canola crops, there is no evidence of pest status in  
559 commercial brassica vegetables, and bioassays suggested that field populations should be eas-  
560 ily controlled with insecticides. Though *P. australiana* is a potential pest of some Australian  
561 Brassica crops, it is of secondary importance to the diamondback moth, *P. xylostella*.

## 562 Acknowledgements

563 We thank the many colleagues who collected *Plutella* samples: Adam Hancock, Adam Pearce,  
564 Adam Quade, Alan Lord, Andrew McMahan, Andy Bates, Andy Ryland, Brenton Spriggs, Chris  
565 Davey, Chris Teague, Craig James, Dustin Berryman, Grant Hudson, Guy Westmore, James  
566 McKee, Jessica Smith, Jo Holloway, Joanne Holloway, Josh Andrews, Josh Hollitt, Karina Ben-  
567 nett, Laura Archer, Levon Cookson, Lisa Ohlson, Louise Flohr, Melina Miles, Michael Collins,  
568 Monica Field, Nigel Myers, Peter Cole, Peter Ellison, Peter Gregg, Peter Mangano, Richard  
569 Saunders, Sarina Macfadyen, Stewart Learmonth. We also thank Lynn Dieckow and Birte Al-  
570 brecht for technical assistance with genotyping. KDP was supported by the University of Ade-

571 laide (UA00146) and the Grains Research and Development Corporation (GRDC) (DAS00094),  
572 GJB, KJP and JKK were supported by GRDC (DAS00155), and SWB was supported by the  
573 Australian Research Council (DP120100047, FT140101303).

## 574 References

- 575 Ahmed, M. Z., Breinholt, J. W., & Kawahara, A. Y. (2016). Evidence for common horizontal  
576 transmission of *Wolbachia* among butterflies and moths. *BMC Evolutionary Biology*, *16*.  
577 doi: 10.1186/s12862-016-0660-x
- 578 Ashfaq, M., & Hebert, P. D. N. (2016). DNA barcodes for bio-surveillance: Regulated and eco-  
579 nomically important arthropod plant pests. *Genome*, *59*(11, 2), 933-945. doi: 10.1139/gen-  
580 2016-0024
- 581 Ashfaq, M., Hebert, P. D. N., Mirza, M. S., Khan, A. M., Mansoor, S., Shah, G. S., & Zafar,  
582 Y. (2014). DNA barcoding of *Bemisia tabaci* complex (Hemiptera: Aleyrodidae) reveals  
583 southerly expansion of the dominant whitefly species on cotton in Pakistan. *PLoS ONE*,  
584 *9*(8). doi: 10.1371/journal.pone.0104485
- 585 Baird, N. A., Etter, P. D., Atwood, T. S., Currey, M. C., Shiver, A. L., Lewis, Z. A., . . . Johnson,  
586 E. A. (2008). Rapid SNP discovery and genetic mapping using sequenced RAD markers.  
587 *PLoS ONE*, *3*(10). doi: 10.1371/journal.pone.0003376
- 588 Baker, G. (2011). Crucifer vegetable insecticide resistance management strategies and issues in  
589 Australia. In Srinivasan, R. and Shelton, Anthony M. and Collins, Hilda L. (Ed.), *The*  
590 *sixth international workshop on management of the diamondback moth and other crucifer*  
591 *insect pests* (pp. 21–25). AVRDC – The World Vegetable Center, Tainan, Taiwan.
- 592 Batista, P. D., Keddie, B. A., Dossall, L. M., & Harris, H. L. (2010). Phylogenetic placement and  
593 evidence for horizontal transfer of *Wolbachia* in *Plutella xylostella* (Lepidoptera: Plutel-  
594 lidae) and its parasitoid, *Diadegma insulare* (Hymenoptera: Ichneumonidae). *Canadian*  
595 *Entomologist*, *142*(1), 57-64. doi: 10.4039/n09-050
- 596 Baxter, S. W., Davey, J. W., Johnston, J. S., Shelton, A. M., Heckel, D. G., Jiggins, C. D.,  
597 & Blaxter, M. L. (2011). Linkage mapping and comparative genomics using next-  
598 generation RAD sequencing of a non-model organism. *PLoS ONE*, *6*(4). doi: 10.1371/jour-  
599 nal.pone.0019315
- 600 Bickford, D., Lohman, D. J., Sodhi, N. S., Ng, P. K. L., Meier, R., Winker, K., . . . Das, I.  
601 (2007). Cryptic species as a window on diversity and conservation. *Trends in Ecology &*  
602 *Evolution*, *22*(3), 148-155. doi: 10.1016/j.tree.2006.11.004
- 603 Bolger, A. M., Lohse, M., & Usadel, B. (2014). Trimmomatic: A flexible trimmer for Illumina  
604 sequence data. *Bioinformatics*, *30*(15). doi: 10.1093/bioinformatics/btu170
- 605 Clarkson, C. S., Weetman, D., Essandoh, J., Yawson, A. E., Maslen, G., Manske, M., . . . Don-  
606 nnelly, M. J. (2014). Adaptive introgression between *Anopheles* sibling species eliminates  
607 a major genomic island but not reproductive isolation. *Nature Communications*, *5*. doi:  
608 10.1038/ncomms5248
- 609 Coetzee, M., Hunt, R. H., Wilkerson, R., Della Torre, A., Coulibaly, M. B., & Besansky, N. J.  
610 (2013). *Anopheles coluzzii* and *Anopheles amharicus*, new members of the *Anopheles*  
611 *gambiae* complex. *Zootaxa*, *3619*(3), 246-274. doi: 10.11646/zootaxa.3619.3.2
- 612 Danecek, P., Auton, A., Abecasis, G., Albers, C. A., Banks, E., DePristo, M. A., . . . Grp,  
613 . G. P. A. (2011, AUG 1). The variant call format and VCFtools. *Bioinformatics*, *27*(15),  
614 2156-2158. doi: 10.1093/bioinformatics/btr330
- 615 De Barro, P. J., Liu, S.-S., Boykin, L. M., & Dinsdale, A. B. (2011). *Bemisia tabaci*: A statement  
616 of species status. *Annual Review of Entomology*, *56*, 1-19. doi: 10.1146/annurev-ento-

- 617 112408-085504
- 618 Delgado, A. M., & Cook, J. M. (2009). Effects of a sex-ratio distorting endosymbiont on mtDNA  
619 variation in a global insect pest. *BMC Evolutionary Biology*, *9*. doi: 10.1186/1471-2148-  
620 9-49
- 621 DePristo, M. A., Banks, E., Poplin, R., Garimella, K. V., Maguire, J. R., Hartl, C., ... Hanna,  
622 M. (2011). A framework for variation discovery and genotyping using next-generation dna  
623 sequencing data. *Nature genetics*, *43*(5), 491–498.
- 624 Derks, M. F. L., Smit, S., Salis, L., Schijlen, E., Bossers, A., Mateman, C., ... Megens, H.-J.  
625 (2015). The genome of winter moth (*Operophtera brumata*) provides a genomic perspective  
626 on sexual dimorphism and phenology. *Genome Biology and Evolution*, *7*(8), 2321-2332.  
627 doi: 10.1093/gbe/evv145
- 628 Dumas, E., Atyame, C. M., Milesi, P., Fonseca, D. M., Shaikevich, E. V., Unal, S., ... Duron,  
629 O. (2013). Population structure of *Wolbachia* and cytoplasmic introgression in a complex  
630 of mosquito species. *BMC Evolutionary Biology*, *13*. doi: 10.1186/1471-2148-13-181
- 631 Dupont, L., Porco, D., Symondson, W. O. C., & Roy, V. (2016). Hybridization relics complicate  
632 barcode-based identification of species in earthworms. *Molecular Ecology Resources*, *16*(4),  
633 883-894. doi: 10.1111/1755-0998.12517
- 634 Earl, D. A., & vonHoldt, B. M. (2012). STRUCTURE HARVESTER: A website and program  
635 for visualizing STRUCTURE output and implementing the Evanno method. *Conservation  
636 Genetics Resources*, *4*(2), 359-361. doi: 10.1007/s12686-011-9548-7
- 637 Endersby, N. M., McKechnie, S. W., Ridland, P. M., & Weeks, A. R. (2006). Microsatellites  
638 reveal a lack of structure in Australian populations of the diamondback moth, *Plutella  
639 xylostella* (L.). *Molecular Ecology*, *15*(1), 107-118. doi: 10.1111/j.1365-294X.2005.02789.x
- 640 Endersby, N. M., Ridland, P. M., & Hoffmann, A. A. (2008). The effects of local se-  
641 lection versus dispersal on insecticide resistance patterns: Longitudinal evidence from  
642 diamondback moth (*Plutella xylostella* (Lepidoptera: Plutellidae)) in Australia evolu-  
643 ing resistance to pyrethroids. *Bulletin of Entomological Research*, *98*(2), 145-157. doi:  
644 10.1017/S0007485307005494
- 645 Endersby, N. M., Viduka, K., Baxter, S. W., Saw, J., Heckel, D. G., & McKechnie, S. W.  
646 (2011). Widespread pyrethroid resistance in Australian diamondback moth, *Plutella xy-*  
647 *lostella* (L.), is related to multiple mutations in the *para* sodium channel gene. *Bulletin of  
648 Entomological Research*, *101*(4), 393-405. doi: 10.1017/S0007485310000684
- 649 Engelstaedter, J., & Hurst, G. D. D. (2009). The ecology and evolution of microbes that  
650 manipulate host reproduction. *Annual Review of Ecology Evolution and Systematics*, *40*,  
651 127-149. doi: 10.1146/annurev.ecolsys.110308.120206
- 652 Evanno, G., Regnaut, S., & Goudet, J. (2005). Detecting the number of clusters of individuals  
653 using the software STRUCTURE: A simulation study. *Molecular Ecology*, *14*(8), 2611-  
654 2620. doi: 10.1111/j.1365-294X.2005.02553.x
- 655 Furlong, M. J., Spafford, H., Ridland, P. M., Endersby, N. M., Edwards, O. R., Baker, G. J.,  
656 ... Paull, C. A. (2008). Ecology of diamondback moth in Australian canola: Landscape  
657 perspectives and the implications for management. *Australian Journal of Experimental  
658 Agriculture*, *48*(12), 1494-1505. doi: 10.1071/EA07413
- 659 Furlong, M. J., Wright, D. J., & Dossall, L. M. (2013). Diamondback moth ecology and  
660 management: Problems, progress, and prospects. *Annual Review of Entomology*, *58*,  
661 517+. doi: 10.1146/annurev-ento-120811-153605
- 662 Gebiola, M., Kelly, S. E., Hammerstein, P., Giorgini, M., & Hunter, M. S. (2016). "Darwin's  
663 corollary" and cytoplasmic incompatibility induced by *Cardinium* may contribute to spe-  
664 ciation in *Encarsia* wasps (Hymenoptera: Aphelinidae). *Evolution*, *70*(11), 2447-2458.  
665 doi: 10.1111/evo.13037

- 666 Goudet, J., & Jombart, T. (2015). hierfstat: Estimation and tests of  
667 hierarchical F-statistics [Computer software manual]. Retrieved from  
668 <https://CRAN.R-project.org/package=hierfstat> (R package version 0.04-22)
- 669 Haldane, J. (1922). Sex ratio and unisexual sterility in hybrid animals. *Journal of Genetics*,  
670 *12*(2), 101-109. doi: 10.1007/BF02983075
- 671 Harrison, R. G., & Larson, E. L. (2014). Hybridization, introgression, and the nature of species  
672 boundaries. *Journal of Heredity*, *105*(1), 795-809. doi: 10.1093/jhered/esu033
- 673 Harrison, R. G., & Larson, E. L. (2016). Heterogeneous genome divergence, differential in-  
674 trogression, and the origin and structure of hybrid zones. *Molecular Ecology*, *25*(11, SI),  
675 2454-2466. doi: 10.1111/mec.13582
- 676 Havill, N. P., Elkinton, J., Andersen, J. C., Hagen, S. B., Broadley, H. J., Boettner, G. J., &  
677 Caccone, A. (2017). Asymmetric hybridization between non-native winter moth, *Operophtera*  
678 *brumata* (Lepidoptera: Geometridae), and native Bruce spanworm, *Operophtera*  
679 *bruceata*, in the Northeastern United States, assessed with novel microsatellites and SNPs.  
680 *Bulletin of Entomological Research*, *107*(2), 241-250. doi: 10.1017/S0007485316000857
- 681 Hebert, P., Penton, E., Burns, J., Janzen, D., & Hallwachs, W. (2004). Ten species in one: DNA  
682 barcoding reveals cryptic species in the neotropical skipper butterfly *Astraptes fulgerator*.  
683 *Proceedings of the National Academy of Sciences of the United States of America*, *101*(41),  
684 14812-14817. doi: 10.1073/pnas.0406166101
- 685 Hedrick, P. W. (2013). Adaptive introgression in animals: Examples and comparison to new  
686 mutation and standing variation as sources of adaptive variation. *Molecular Ecology*,  
687 *22*(18), 4606-4618. doi: 10.1111/mec.12415
- 688 Hendrichs, J., Teresa Vera, M., De Meyer, M., & Clarke, A. R. (2015). Resolving cryptic species  
689 complexes of major tephritid pests. *ZooKeys*(540), 5-39. doi: 10.3897/zookeys.540.9656
- 690 Hilgenboecker, K., Hammerstein, P., Schlattmann, P., Telschow, A., & Werren, J. H. (2008).  
691 How many species are infected with *Wolbachia*? - a statistical analysis of current data.  
692 *Fems Microbiology Letters*, *281*(2), 215-220. doi: 10.1111/j.1574-6968.2008.01110.x
- 693 Hurst, G., & Jiggins, F. (2005). Problems with mitochondrial DNA as a marker in pop-  
694 ulation, phylogeographic and phylogenetic studies: The effects of inherited symbionts.  
695 *Proceedings of the Royal Society B-Biological Sciences*, *272*(1572), 1525-1534. doi:  
696 10.1098/rspb.2005.3056
- 697 Jacobson, A. L., Nault, B. A., Vargo, E. L., & Kennedy, G. G. (2016). Restricted gene flow  
698 among lineages of *Thrips tabaci* supports genetic divergence among cryptic species groups.  
699 *PLoS ONE*, *11*(9). doi: 10.1371/journal.pone.0163882
- 700 Jaenike, J., Dyer, K. A., Cornish, C., & Minhas, M. S. (2006). Asymmetrical reinforcement and  
701 *Wolbachia* infection in *Drosophila*. *PLoS Biology*, *4*(10), 1852-1862. doi: 10.1371/jour-  
702 nal.pbio.0040325
- 703 Jakobsson, M., & Rosenberg, N. A. (2007). CLUMPP: A cluster matching and permutation  
704 program for dealing with label switching and multimodality in analysis of population  
705 structure. *Bioinformatics*, *23*(14), 1801-1806. doi: 10.1093/bioinformatics/btm233
- 706 Jeyaprakash, A., & Hoy, M. (2000). Long PCR improves *Wolbachia* DNA amplification: *wsp*  
707 sequences found in 76% of sixty-three arthropod species. *Insect Molecular Biology*, *9*(4),  
708 393-405. doi: 10.1046/j.1365-2583.2000.00203.x
- 709 Jiggins, C., Linares, M., Naisbit, R., Salazar, C., Yang, Z., & Mallet, J. (2001). Sex-linked  
710 hybrid sterility in a butterfly. *Evolution*, *55*(8), 1631-1638.
- 711 Jiggins, F. M. (2017). The spread of *Wolbachia* through mosquito populations. *PLoS Biology*,  
712 *15*(6). doi: 10.1371/journal.pbio.2002780
- 713 Juric, I., Salzburger, W., & Balmer, O. (2017). Spread and global population structure  
714 of the diamondback moth *Plutella xylostella* (Lepidoptera: Plutellidae) and its lar-

- 715 val parasitoids *Diadegma semiclausum* and *Diadegma fenestrata* (Hymenoptera: Ichneu-  
716 monidae) based on mtDNA. *Bulletin of Entomological Research*, 107(2), 155-164. doi:  
717 10.1017/S0007485316000766
- 718 Justus, K., & Mitchell, B. (1996). Oviposition site selection by the diamondback moth, *Plutella*  
719 *xylostella* (L) (Lepidoptera: Plutellidae). *Journal of Insect Behaviour*, 9(6), 887-898. doi:  
720 10.1007/BF02208976
- 721 Kalinowski, S. T. (2011). The computer program STRUCTURE does not reliably identify the  
722 main genetic clusters within species: Simulations and implications for human population  
723 structure. *Heredity*, 106(4), 625-632. doi: 10.1038/hdy.2010.95
- 724 Kearse, M., Moir, R., Wilson, A., Stones-Havas, S., Cheung, M., Sturrock, S., ... Drummond,  
725 A. (2012). Geneious Basic: An integrated and extendable desktop software platform for  
726 the organization and analysis of sequence data. *Bioinformatics*, 28(12), 1647-1649. doi:  
727 10.1093/bioinformatics/bts199
- 728 Keenan, K., McGinnity, P., Cross, T. F., Crozier, W. W., & Prodoehl, P. A. (2013, AUG).  
729 diveRsity: An R package for the estimation and exploration of population genetics param-  
730 eters and their associated errors. *Methods in Ecology and Evolution*, 4(8), 782-788. doi:  
731 10.1111/2041-210X.12067
- 732 Landry, J.-F., & Hebert, P. D. N. (2013). *Plutella australiana* (Lepidoptera, Plutellidae), an  
733 overlooked diamondback moth revealed by DNA barcodes. *ZooKeys*(327), 43-63. doi:  
734 10.3897/zookeys.327.5831
- 735 Li, Z., Feng, X., Liu, S.-S., You, M., & Furlong, M. J. (2016). Biology, ecology, and management  
736 of the diamondback moth in China. *Annual Review of Entomology*, 61, 277-296. doi:  
737 10.1146/annurev-ento-010715-023622
- 738 Lunter, G., & Goodson, M. (2011). Stampy: A statistical algorithm for sensitive and  
739 fast mapping of Illumina sequence reads. *Genome Research*, 21(6), 936-939. doi:  
740 10.1101/gr.111120.110
- 741 Mallet, J. (2005). Hybridization as an invasion of the genome. *Trends in Ecology & Evolution*,  
742 20(5), 229-237. doi: 10.1016/j.tree.2005.02.010
- 743 McKenna, A., Hanna, M., Banks, E., Sivachenko, A., Cibulskis, K., Kernysky, A., ... De-  
744 Pristo, M. A. (2010). The Genome Analysis Toolkit: A MapReduce framework for ana-  
745 lyzing next-generation DNA sequencing data. *Genome Research*, 20(9), 1297-1303. doi:  
746 10.1101/gr.107524.110
- 747 Miller, A. D., Skoracka, A., Navia, D., de Mendonca, R. S., Szydlo, W., Schultz, M. B., ...  
748 Hoffmann, A. A. (2013). Phylogenetic analyses reveal extensive cryptic speciation and  
749 host specialization in an economically important mite taxon. *Molecular Phylogenetics and*  
750 *Evolution*, 66(3), 928-940. doi: 10.1016/j.ympev.2012.11.021
- 751 Munoz, A. G., Baxter, S. W., Linares, M., & Jiggins, C. D. (2011). Deep mitochondrial  
752 divergence within a *Heliconius* butterfly species is not explained by cryptic speciation or  
753 endosymbiotic bacteria. *BMC Evolutionary Biology*, 11. doi: 10.1186/1471-2148-11-358
- 754 Nei, M. (1987). *Molecular evolutionary genetics*. Columbia University Press.
- 755 Paradis, E. (2010). pegas: An R package for population genetics with an integrated-modular  
756 approach. *Bioinformatics*, 26(3), 419-420. doi: 10.1093/bioinformatics/btp696
- 757 Perry, K. D., Pederson, S. M., & Baxter, S. W. (2017). Genome-wide SNP discovery in  
758 field and laboratory colonies of Australian *Plutella* species. *bioRxiv*. Retrieved from  
759 <http://www.biorxiv.org/content/early/2017/05/24/141606> doi: 10.1101/141606
- 760 Pfenninger, M., & Schwenk, K. (2007). Cryptic animal species are homogeneously dis-  
761 tributed among taxa and biogeographical regions. *BMC Evolutionary Biology*, 7. doi:  
762 10.1186/1471-2148-7-121
- 763 Pichon, A., Arvanitakis, L., Roux, O., Kirk, A., Alauzet, C., Bordat, D., & Legal, L. (2006).



- 764 Genetic differentiation among various populations of the diamondback moth, *Plutella xy-*  
765 *lostella* (Lepidoptera : Yponomeutidae). *Bulletin of Entomological Research*, 96(2), 137-  
766 144. doi: 10.1079/BER2005409
- 767 Pivnick, K., Jarvis, B., Gillott, C., Slater, G., & Underhill, E. (1990). Daily patterns of reproduc-  
768 tive activity and the influence of adult density and exposure to host plants on reproduction  
769 in the diamondback moth (Lepidoptera, Plutellidae). *Environmental Entomology*, 19(3),  
770 587-593.
- 771 Pritchard, J., Stephens, M., & Donnelly, P. (2000). Inference of population structure using  
772 multilocus genotype data. *Genetics*, 155(2), 945-959.
- 773 R Core Team. (2017). R: A Language and Environment for Statistical Computing [Computer  
774 software manual]. Vienna, Austria. Retrieved from <https://www.R-project.org/>
- 775 Renwick, J., Haribal, M., Gouinguene, S., & Stadler, E. (2006). Isothiocyanates stimulating  
776 oviposition by the diamondback moth, *Plutella xylostella*. *Journal of Chemical Ecology*,  
777 32(4), 755-766. doi: 10.1007/s10886-006-9036-9
- 778 Ridland, P., & Endersby, N. (2008). Seasonal phenology of diamondback moth populations in  
779 southern Australia. In Shelton, Anthony M. and Collins, Hilda L. and Zhang, Y and Wu,  
780 Q (Ed.), *The management of diamondback moth and other crucifer pests: Proceedings of*  
781 *the fifth international workshop* (pp. 90–101). China Agricultural Science and Technology  
782 Press, Beijing, China.
- 783 Ritter, S., Michalski, S. G., Settele, J., Wiemers, M., Fric, Z. F., Sielezniew, M., ... Durka, W.  
784 (2013). *Wolbachia* infections mimic cryptic speciation in two parasitic butterfly species,  
785 *Phengaris teleius* and *P. nausithous* (Lepidoptera: Lycaenidae). *PLoS ONE*, 8(11). doi:  
786 10.1371/journal.pone.0078107
- 787 Ritz, C., Baty, F., Streibig, J. C., & Gerhard, D. (2015). Dose-Response Analysis Using R.  
788 *PLoS ONE*, 10(12). doi: 10.1371/journal.pone.0146021
- 789 Robinson, G. S., & Sattler, K. (2001). *Plutella* in the Hawaiian Islands: Relatives and host-  
790 races of the diamondback moth (Lepidoptera: Plutellidae). *Bishop Museum Occasional*  
791 *Papers*(67), 1-27.
- 792 Roe, A. D., & Sperling, F. A. H. (2007). Population structure and species boundary delimitation  
793 of cryptic *Dioryctria* moths: An integrative approach. *Molecular Ecology*, 16(17), 3617-  
794 3633. doi: 10.1111/j.1365-294X.2007.03412.x
- 795 Rosenberg, N. (2004). DISTRUCT: A program for the graphical display of population structure.  
796 *Molecular Ecology Notes*, 4(1), 137-138. doi: 10.1046/j.1471-8286.2003.00566.x
- 797 Rousset, F. (2008). GENEPOP '007: A complete re-implementation of the GENEPOP software  
798 for Windows and Linux. *Molecular Ecology Resources*, 8(1), 103-106. doi: 10.1111/j.1471-  
799 8286.2007.01931.x
- 800 Roux, O., Gevrey, M., Arvanitakis, L., Gers, C., Bordat, D., & Legal, L. (2007). ISSR-PCR: Tool  
801 for discrimination and genetic structure analysis of *Plutella xylostella* populations native  
802 to different geographical areas. *Molecular Phylogenetics and Evolution*, 43(1), 240-250.  
803 doi: 10.1016/j.ympev.2006.09.017
- 804 Rugman-Jones, P. F., Hoddle, M. S., & Stouthamer, R. (2010). Nuclear-mitochondrial barcoding  
805 exposes the global pest Western flower thrips (Thysanoptera: Thripidae) as two sympatric  
806 cryptic species in its native California. *Journal of Economic Entomology*, 103(3), 877-886.  
807 doi: 10.1603/EC09300
- 808 Sarfraz, M., Dossall, L., & Keddie, B. (2006). Diamondback moth-host plant interac-  
809 tions: Implications for pest management. *Crop Protection*, 25(7), 625-639. doi:  
810 10.1016/j.cropro.2005.09.011
- 811 Saw, J., Endersby, N. M., & McKechnie, S. W. (2006). Low mtDNA diversity among widespread  
812 Australian diamondback moth *Plutella xylostella* (L.) suggests isolation and a founder

- effect. *Insect Science*, 13(5), 365–373.
- 814 Shoemaker, D., Dyer, K., Ahrens, M., McAbee, K., & Jaenike, J. (2004). Decreased diversity but  
815 increased substitution rate in host mtDNA as a consequence of *Wolbachia* endosymbiont  
816 infection. *Genetics*, 168(4), 2049-2058. doi: 10.1534/genetics.104.030890
- 817 Shropshire, J. D., & Bordenstein, S. R. (2016). Speciation by symbiosis: The microbiome and  
818 behavior. *MBIO*, 7(2). doi: 10.1128/mBio.01785-15
- 819 Simoes, P. M., Mialdea, G., Reiss, D., Sagot, M.-F., & Charlat, S. (2011). *Wolbachia* detection:  
820 An assessment of standard PCR Protocols. *Molecular Ecology Resources*, 11(3), 567-572.  
821 doi: 10.1111/j.1755-0998.2010.02955.x
- 822 Skoracka, A., Kuczynski, L., Szydło, W., & Rector, B. (2013). The wheat curl mite *Ace-*  
823 *ria tosichella* (Acari: Eriophyoidea) is a complex of cryptic lineages with divergent host  
824 ranges: Evidence from molecular and plant bioassay data. *Biological Journal of the Lin-*  
825 *nean Society*, 109(1), 165-180. doi: 10.1111/bij.12024
- 826 Smith, M. A., Bertrand, C., Crosby, K., Eveleigh, E. S., Fernandez-Triana, J., Fisher, B. L.,  
827 ... Zhou, X. (2012). *Wolbachia* and DNA barcoding insects: Patterns, potential, and  
828 problems. *PLoS ONE*, 7(5). doi: 10.1371/journal.pone.0036514
- 829 Stamatakis, A. (2014). RAxML version 8: A tool for phylogenetic analysis and post-analysis of  
830 large phylogenies. *Bioinformatics*, 30(9), 1312-1313. doi: 10.1093/bioinformatics/btu033
- 831 Sun, J. Y., Sonderby, I. E., Halkier, B. A., Jander, G., & de Vos, M. (2009). Non-volatile intact  
832 indole glucosinolates are host recognition cues for ovipositing *Plutella xylostella*. *Journal*  
833 *of Chemical Ecology*, 35(12), 1427-1436. doi: 10.1007/s10886-009-9723-4
- 834 Sun, X.-J., Xiao, J.-H., Cook, J. M., Feng, G., & Huang, D.-W. (2011). Comparisons of host  
835 mitochondrial, nuclear and endosymbiont bacterial genes reveal cryptic fig wasp species  
836 and the effects of *Wolbachia* on host mtDNA evolution and diversity. *BMC Evolutionary*  
837 *Biology*, 11. doi: 10.1186/1471-2148-11-86
- 838 Talekar, N., & Shelton, A. (1993). Biology, ecology, and management of the diamondback moth.  
839 *Annual Review of Entomology*, 38, 275-301. doi: 10.1146/annurev.en.38.010193.001423
- 840 Telschow, A., Hilgenboecker, K., Hammerstein, P., & Werren, J. H. (2014). Dobzhansky-Muller  
841 and *Wolbachia*-induced incompatibilities in a diploid genetic system. *PLoS ONE*, 9(4).  
842 doi: 10.1371/journal.pone.0095488
- 843 Turelli, M., & Moyle, L. C. (2007). Asymmetric postmating isolation: Darwin's corollary to  
844 Haldane's rule. *Genetics*, 176(2), 1059-1088. doi: 10.1534/genetics.106.065979
- 845 Turelli, M., & Orr, H. (2000). Dominance, epistasis and the genetics of postzygotic isolation.  
846 *Genetics*, 154(4), 1663-1679.
- 847 Umina, P., Hoffmann, A., & Weeks, A. (2004). Biology, ecology and control of the *Penthaleus*  
848 species complex (Acari: Penthalidae). *Experimental and Applied Acarology*, 34(3-4),  
849 211-237.
- 850 Weinert, L. A., Araujo-Jnr, E. V., Ahmed, M. Z., & Welch, J. J. (2015). The incidence of  
851 bacterial endosymbionts in terrestrial arthropods. *Proceedings of the Royal Society B-*  
852 *Biological Sciences*, 282(1807). doi: 10.1098/rspb.2015.0249
- 853 Weir, B., & Cockerham, C. (1984). Estimating F-statistics for the analysis of population-  
854 structure. *Evolution*, 38(6), 1358-1370. doi: 10.2307/2408641
- 855 Werren, J. H., Baldo, L., & Clark, M. E. (2008). *Wolbachia*: Master manipulators of invertebrate  
856 biology. *Nature Reviews Microbiology*, 6(10), 741-751. doi: 10.1038/nrmicro1969
- 857 Whitworth, T. L., Dawson, R. D., Magalon, H., & Baudry, E. (2007). DNA barcoding can-  
858 not reliably identify species of the blowfly genus *Protocalliphora* (Diptera : Calliphori-  
859 dae). *Proceedings of the Royal Society B-Biological Sciences*, 274(1619), 1731-1739. doi:  
860 10.1098/rspb.2007.0062
- 861 Zalucki, M. P., Shabbir, A., Silva, R., Adamson, D., Shu-Sheng, L., & Furlong, M. J. (2012).

- 862 Estimating the economic cost of one of the world's major insect pests, *Plutella xylostella*  
863 (Lepidoptera: Plutellidae): Just how long is a piece of string? *Journal of Economic*  
864 *Entomology*, 105(4), 1115-1129. doi: 10.1603/EC12107
- 865 Zhou, W., Rousset, F., & O'Neill, S. (1998). Phylogeny and PCR-based classification of *Wol-*  
866 *bachia* strains using *wsp* gene sequences. *Proceedings of the Royal Society B-Biological*  
867 *Sciences*, 265(1395), 509-515.
- 868 Zraket, C., Barth, J., Heckel, D., & Abbott, A. (1990). *Genetic linkage mapping with restriction*  
869 *fragment length polymorphisms in the tobacco budworm, heliothis virescens*. Springer US.

## 870 **Data accessibility**

871 DNA sequences: GenBank accession numbers MF804301-MF804314 (*wsp*) and MF151826-MF151906  
872 (COI). RADseq FASTQ files will be submitted to the NCBI Sequence Read Archive.

## 873 **Author contributions**

874 Wrote the manuscript: KDP, SWB

875 Conceived and designed experiments: All

876 Data analysis: KDP, SWB, CMW

877 Sample collection: KDP

878 COI genotyping, RADseq: KDP, SWB

879 *Wolbachia* genotyping: SWB, CMW

880 *Plutella* cultures, bioassays and crossing experiments: KJP, JKK, GJB

## 881 **Table and Figures**

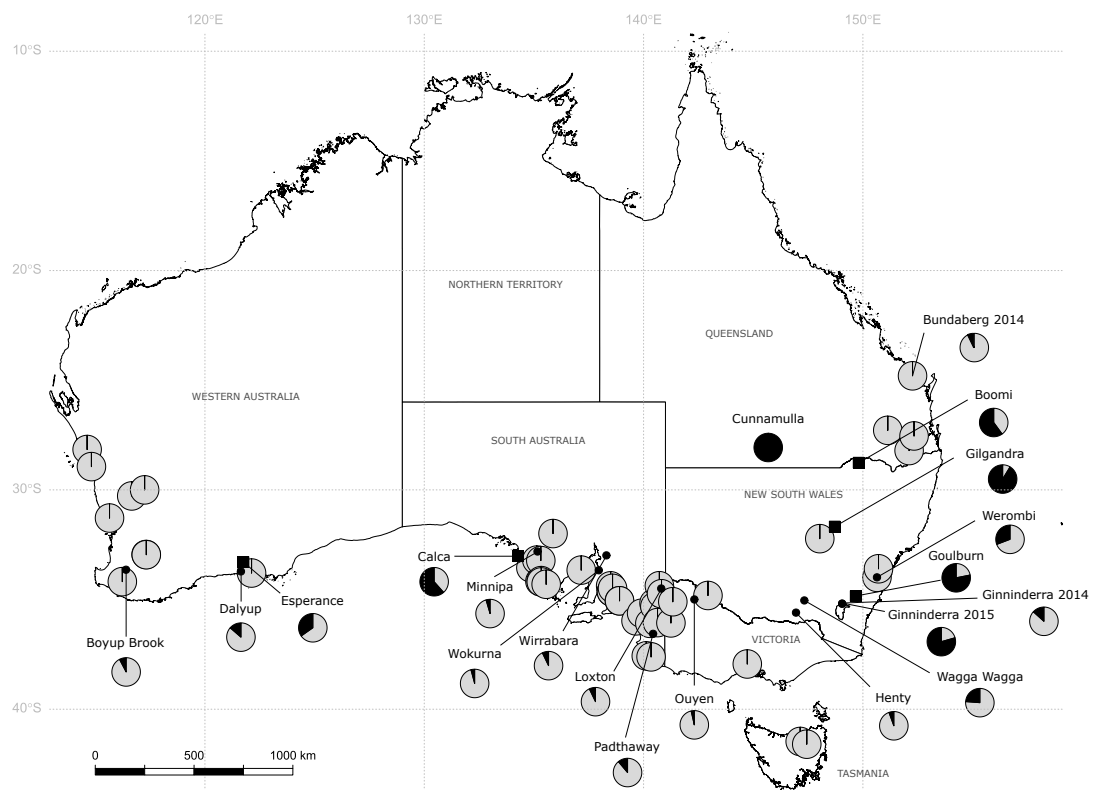

Figure 1: The distribution of *P. xylostella* (light grey) and *P. australiana* individuals (black) in larval collections from brassicaceous plants in Australia during 2014 and 2015. Pie diagrams show the relative proportion of each species at each location. Overlapped pies represent locations with 100% *P. xylostella*. Black squares indicate five locations where individuals of each species were RAD sequenced.

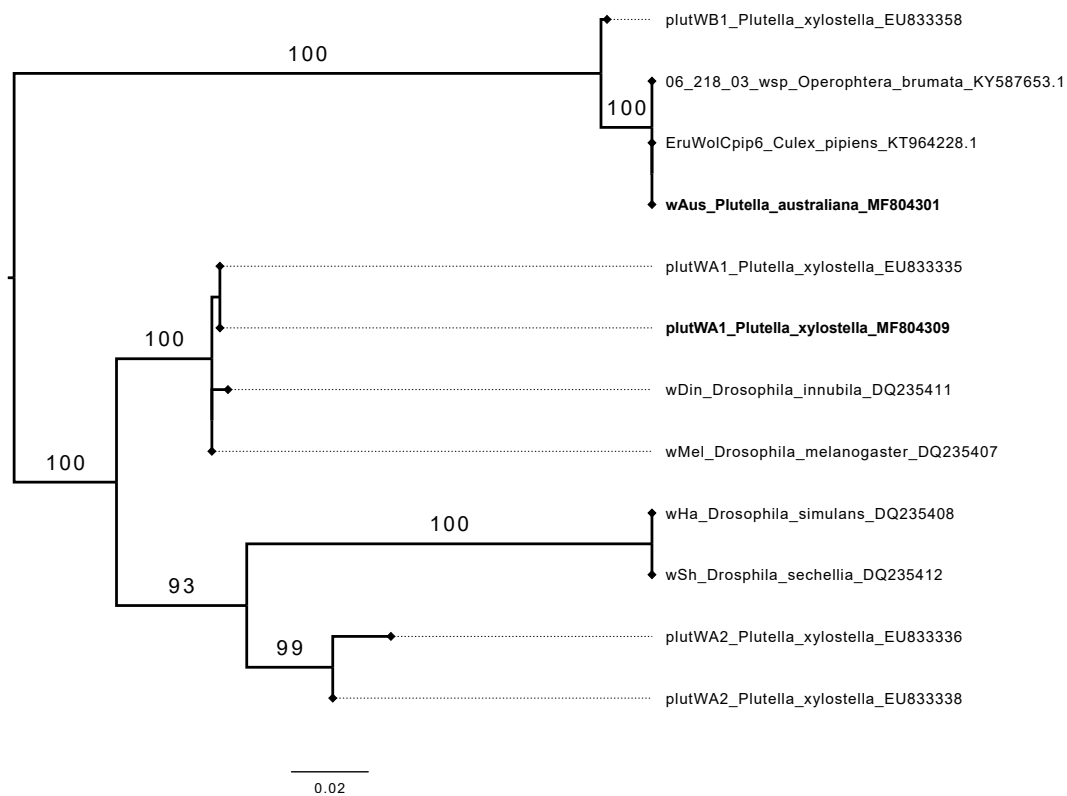

Figure 2: Maximum likelihood phylogeny of *Wolbachia* *wsp* amplicons for *Plutella* and other arthropods. The strain infecting *P. australiana* (*wAus*) was identical to a *Wolbachia* supergroup B strain reported from *Culex pipiens* and *Operophtera brumata*. The strain infecting Australian *P. xylostella* was identical to a supergroup A strain (*plutWA1*) reported from Malaysian *P. xylostella*. Labels include the *Wolbachia* strain, host species and GenBank accession number. Labels in bold denote strains sequenced in this study.

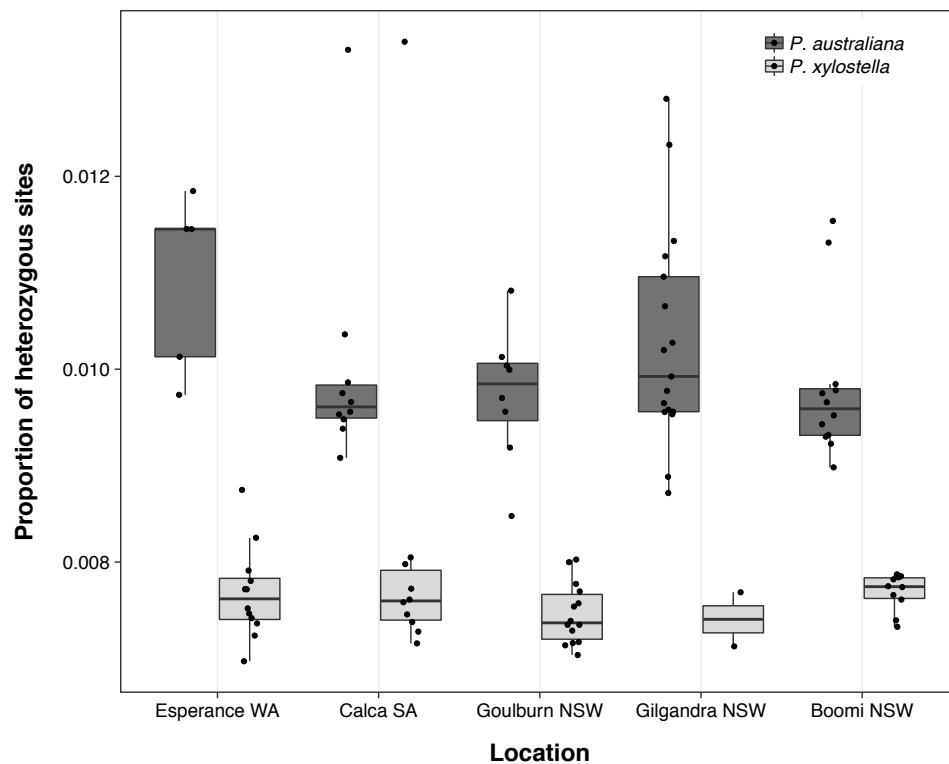

Figure 3: The proportion of heterozygous sites across 293 372 confidently called nuclear sites for individuals of *P. xylostella* (light grey boxes, n = 48) and *P. australiana* (dark grey boxes, n = 52) from five locations. Heterozygosity was consistently higher in *P. australiana*.

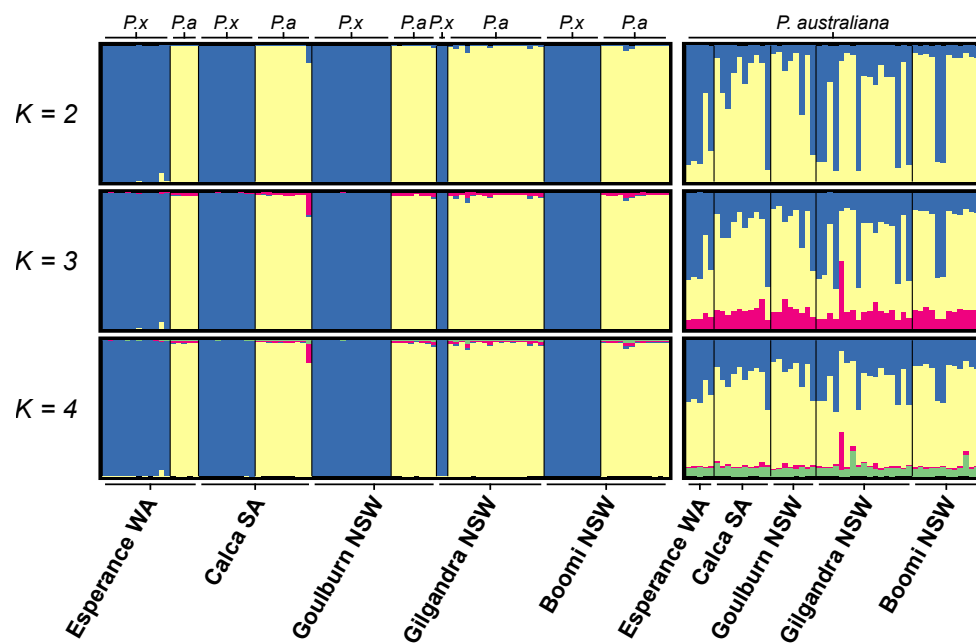

Figure 4: Proportional assignment of *Plutella* individuals to genotypic clusters,  $K$ , based on Bayesian STRUCTURE analysis. Individuals are represented by vertical bars and genotypic clusters are represented by different colours. Bar plots are presented for  $K$  values from 2–4. Left panel: Analysis for 48 *P. xylostella* (labelled *P.x*) and 52 *P. australiana* (labelled *P.a*). Right panel: Analysis for 52 *P. australiana* individuals alone.

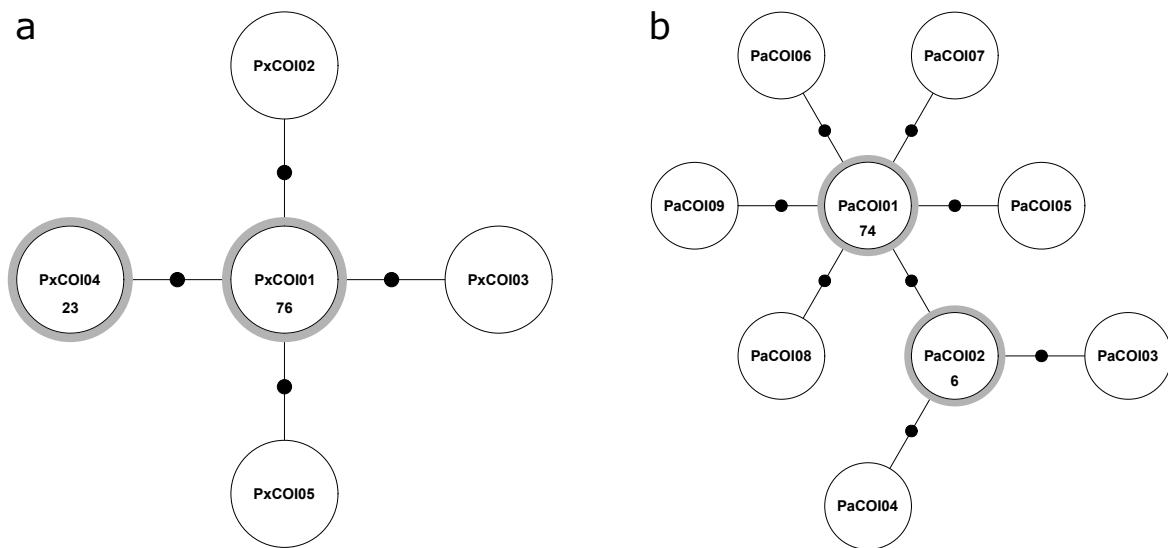

Figure 5: Haplotype network for *P. xylostella* (a) (n=102, this study 44) and *P. australiana* (b) (n=87, this study 37) individuals from Australia based on a 613 bp COI sequence alignment. Haplotypes shared by more than one individual are shown in circles with a grey border with the number of individuals indicated inside the circle. Small solid circles each denote one base difference between haplotypes



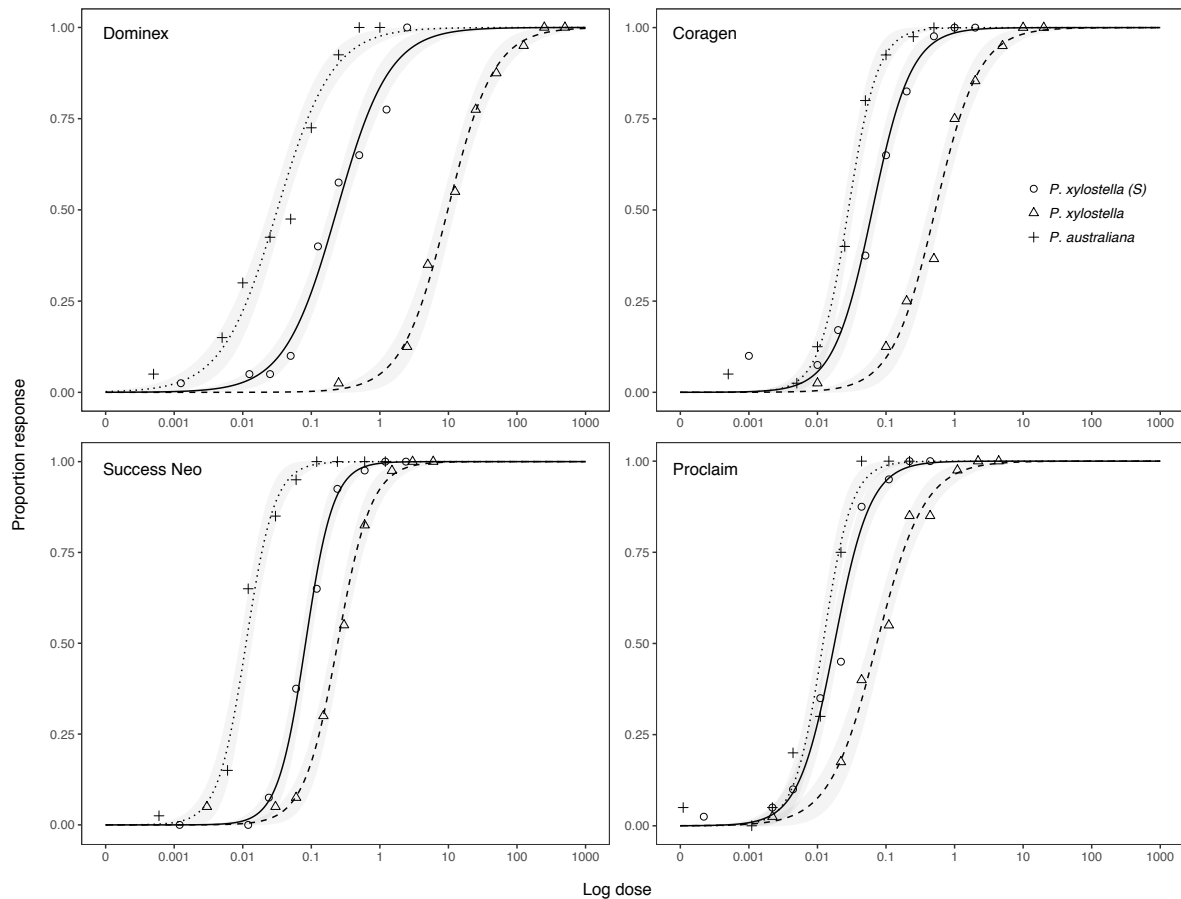

Figure 6: Dose response curves for *P. xylostella* and *P. australiana* field strains collected from Angle Vale and Urrbrae, South Australia, and a susceptible *P. xylostella* (S) reference strain, exposed to four commercial insecticides: Dominex, Coragen, Proclaim and Success Neo. Points are the mean observed response across four bioassay replicates and lines are the fitted log-logistic response curves with 95% confidence intervals shown in grey shading.

Table 1: Summary of *Plutella* collections from Australia. For each location, the numbers and frequency ( $f$ ) of each species and the *Wolbachia* infection status of *P. xylostella* are presented. All *P. australiana* individuals were infected with *Wolbachia*.

| Location         | Collection date | Latitude | Longitude | Host                     | No. genotyped | <i>P. australiana</i> |                    | <i>P. xylostella</i> |                                  |
|------------------|-----------------|----------|-----------|--------------------------|---------------|-----------------------|--------------------|----------------------|----------------------------------|
|                  |                 |          |           |                          |               | No. ( $f$ )           | No. ( $f$ )        | No. ( $f$ )          | No. ( $f$ ) <i>wol</i> -infected |
| Boomi NSW        | Sep-14          | -28.76°  | 149.81°   | Canola                   | 25            | 15 (0.60)             | 10 (0.40)          | 0 (0.00)             |                                  |
| Gilgandra NSW    | Sep-14          | -31.67°  | 148.72°   | Wild turnip              | 23            | 21 (0.91)             | 2 (0.09)           | 0 (0.00)             |                                  |
| Ginninderra NSW  | Oct-15          | -35.19°  | 149.05°   | Canola                   | 34            | 27 (0.79)             | 7 (0.21)           | 0 (0.00)             |                                  |
| Ginninderra NSW  | Sep-14          | -35.19°  | 149.05°   | Canola                   | 15            | 2 (0.13)              | 13 (0.87)          | 0 (0.00)             |                                  |
| Goulburn NSW     | Nov-15          | -34.84°  | 149.67°   | Canola                   | 32            | 25 (0.78)             | 7 (0.22)           | 0 (0.00)             |                                  |
| Henty NSW        | Oct-14          | -35.60°  | 146.95°   | Canola                   | 18            | 1 (0.06)              | 17 (0.94)          | 0 (0.00)             |                                  |
| Narromine NSW    | Sep-14          | -32.22°  | 148.03°   | Canola                   | 26            | 0 (0.00)              | 26 (1.00)          | 1 (0.04)             |                                  |
| Richmond NSW     | Oct-15          | -33.60°  | 150.71°   | Cabbage                  | 21            | 0 (0.00)              | 21 (1.00)          | 0 (0.00)             |                                  |
| Wagga Wagga NSW  | Sep-14          | -35.04°  | 147.33°   | Canola                   | 21            | 5 (0.24)              | 16 (0.76)          | 0 (0.00)             |                                  |
| Werombi NSW      | Oct-15          | -34.00°  | 150.56°   | Kale                     | 13            | 4 (0.31)              | 9 (0.69)           | 0 (0.00)             |                                  |
| Werombi NSW      | Nov-14          | -33.99°  | 150.64°   | Vegetables               | 16            | 0 (0.00)              | 16 (1.00)          | 0 (0.00)             |                                  |
| Bundaberg QLD    | Oct-14          | -24.80°  | 152.26°   | Canola                   | 14            | 1 (0.07)              | 13 (0.93)          | 0 (0.00)             |                                  |
| Bundaberg QLD    | Sep-15          | -24.80°  | 152.26°   | Canola                   | 30            | 0 (0.00)              | 30 (1.00)          | 0 (0.00)             |                                  |
| Cunnamulla QLD   | Sep-15          | -28.07°  | 145.68°   | African mustard          | 17            | 17 (1.00)             | 0 (0.00)           | 0                    |                                  |
| Dalby QLD        | Sep-14          | -27.28°  | 151.13°   | Canola                   | 30            | 0 (0.00)              | 30 (1.00)          | 0 (0.00)             |                                  |
| Gatton QLD       | Oct-14          | -27.54°  | 152.33°   | Broccoli                 | 16            | 0 (0.00)              | 16 (1.00)          | 0 (0.00)             |                                  |
| Gatton QLD       | Nov-15          | -27.54°  | 152.33°   | Broccoli                 | 15            | 0 (0.00)              | 15 (1.00)          | 0 (0.00)             |                                  |
| Warwick QLD      | Oct-15          | -28.21°  | 152.11°   | Canola                   | 16            | 0 (0.00)              | 16 (1.00)          | 0 (0.00)             |                                  |
| Calca SA         | Apr-14          | -33.02°  | 134.28°   | Sand rocket, Wall rocket | 13            | 8 (0.62)              | 5 (0.38)           | 0 (0.00)             |                                  |
| Cocata SA        | Sep-14          | -33.20°  | 135.13°   | Canola                   | 18            | 0 (0.00)              | 18 (1.00)          | 0 (0.00)             |                                  |
| Colebatch SA     | Feb-15          | -35.97°  | 139.66°   | Forage brassica          | 18            | 0 (0.00)              | 18 (1.00)          | 0 (0.00)             |                                  |
| Coonalpyn SA     | Oct-15          | -35.62°  | 139.91°   | Wild radish              | 11            | 0 (0.00)              | 11 (1.00)          | 0 (0.00)             |                                  |
| Cowell SA        | Sep-14          | -33.66°  | 137.16°   | Canola                   | 16            | 0 (0.00)              | 16 (1.00)          | 0 (0.00)             |                                  |
| Keith SA         | Oct-14          | -36.09°  | 140.29°   | Canola                   | 32            | 0 (0.00)              | 32 (1.00)          | 6 (0.19)             |                                  |
| Lameroo SA       | Sep-14          | -35.32°  | 140.51°   | Canola                   | 16            | 0 (0.00)              | 16 (1.00)          | 0 (0.00)             |                                  |
| Lameroo SA       | Oct-15          | -35.17°  | 140.48°   | Canola                   | 14            | 0 (0.00)              | 14 (1.00)          | 0 (0.00)             |                                  |
| Littlehampton SA | Oct-14          | -35.06°  | 138.90°   | Cabbage                  | 34            | 0 (0.00)              | 34 (1.00)          | 6 (0.18)             |                                  |
| Littlehampton SA | Sep-15          | -35.06°  | 138.90°   | Brussels sprouts         | 8             | 0 (0.00)              | 8 (1.00)           | 0 (0.00)             |                                  |
| Loxton SA        | Oct-15          | -34.50°  | 140.80°   | Canola                   | 14            | 1 (0.07)              | 13 (0.93)          | 0 (0.00)             |                                  |
| Loxton SA        | Sep-14          | -34.37°  | 140.72°   | Canola                   | 31            | 0 (0.00)              | 31 (1.00)          | 0 (0.00)             |                                  |
| Mallala SA       | Sep-15          | -34.38°  | 138.50°   | Canola                   | 26            | 0 (0.00)              | 26 (1.00)          | 0 (0.00)             |                                  |
| Meribah SA       | Sep-14          | -34.74°  | 140.82°   | Canola                   | 16            | 0 (0.00)              | 16 (1.00)          | 0 (0.00)             |                                  |
| Millicent SA     | Apr-15          | -37.61°  | 140.34°   | Canola                   | 9             | 0 (0.00)              | 9 (1.00)           | 2 (0.22)             |                                  |
| Minnipa SA       | Oct-15          | -32.81°  | 135.16°   | Canola                   | 22            | 1 (0.05)              | 21 (0.95)          | 0 (0.00)             |                                  |
| Moonaree SA      | Aug-14          | -31.99°  | 135.87°   | Ward's weed              | 16            | 0 (0.00)              | 16 (1.00)          | 0 (0.00)             |                                  |
| Mt Hope SA       | Sep-14          | -34.14°  | 135.33°   | Canola                   | 29            | 0 (0.00)              | 29 (1.00)          | 0 (0.00)             |                                  |
| Mt Hope SA       | Sep-15          | -34.20°  | 135.34°   | Canola                   | 16            | 0 (0.00)              | 16 (1.00)          | 0 (0.00)             |                                  |
| Padthaway SA     | Oct-15          | -36.56°  | 140.43°   | Canola                   | 18            | 2 (0.11)              | 16 (0.89)          | 0 (0.00)             |                                  |
| Picnic Beach SA  | Sep-14          | -34.17°  | 135.27°   | Sea rocket               | 16            | 0 (0.00)              | 16 (1.00)          | 0 (0.00)             |                                  |
| Picnic Beach SA  | Apr-14          | -34.17°  | 135.27°   | Sea rocket               | 2             | 0 (0.00)              | 2 (1.00)           | 0 (0.00)             |                                  |
| Redbanks SA      | Oct-14          | -34.49°  | 138.59°   | Canola                   | 38            | 0 (0.00)              | 38 (1.00)          | 1 (0.03)             |                                  |
| Sherwood SA      | Oct-14          | -36.05°  | 140.64°   | Wild radish              | 8             | 0 (0.00)              | 8 (1.00)           | 0 (0.00)             |                                  |
| Southend SA      | Apr-15          | -37.57°  | 140.12°   | Sea rocket               | 18            | 0 (0.00)              | 18 (1.00)          | 0 (0.00)             |                                  |
| Tintinara SA     | Oct-15          | -35.97°  | 139.66°   | Forage brassica          | 17            | 0 (0.00)              | 17 (1.00)          | 0 (0.00)             |                                  |
| Ucontichie SA    | Sep-14          | -33.22°  | 135.31°   | Canola                   | 3             | 0 (0.00)              | 3 (1.00)           | 0 (0.00)             |                                  |
| Virginia SA      | Oct-14          | -34.64°  | 138.54°   | Broccoli                 | 18            | 0 (0.00)              | 18 (1.00)          | 1 (0.06)             |                                  |
| Virginia SA      | Sep-15          | -34.64°  | 138.54°   | Cabbage                  | 23            | 0 (0.00)              | 23 (1.00)          | 0 (0.00)             |                                  |
| Walkers Beach SA | Sep-14          | -33.55°  | 134.86°   | Sea rocket               | 16            | 0 (0.00)              | 16 (1.00)          | 0 (0.00)             |                                  |
| Walkers Beach SA | Mar-15          | -33.55°  | 134.86°   | Sea rocket               | 16            | 0 (0.00)              | 16 (1.00)          | 0 (0.00)             |                                  |
| Walkers Beach SA | Sep-15          | -33.55°  | 134.86°   | Sea rocket               | 19            | 0 (0.00)              | 19 (1.00)          | 0 (0.00)             |                                  |
| Wirrabara SA     | Oct-14          | -32.99°  | 138.31°   | Canola                   | 28            | 2 (0.07)              | 26 (0.93)          | 0 (0.00)             |                                  |
| Wokurna SA       | Sep-15          | -33.67°  | 137.96°   | Wild radish              | 24            | 1 (0.04)              | 23 (0.96)          | 0 (0.00)             |                                  |
| Wurramunda SA    | Apr-14          | -34.30°  | 135.56°   | Wild canola              | 16            | 0 (0.00)              | 16 (1.00)          | 0 (0.00)             |                                  |
| Deddington TAS   | Nov-14          | -41.59°  | 147.44°   | Kale                     | 16            | 0 (0.00)              | 16 (1.00)          | 0 (0.00)             |                                  |
| Launceston TAS   | Nov-14          | -41.47°  | 147.14°   | Wild mustard             | 16            | 0 (0.00)              | 16 (1.00)          | 0 (0.00)             |                                  |
| Newstead TAS     | Nov-15          | -41.59°  | 147.44°   | Cauliflower              | 22            | 0 (0.00)              | 22 (1.00)          | 0 (0.00)             |                                  |
| Cowangie VIC     | Oct-15          | -35.10°  | 141.33°   | Canola                   | 19            | 0 (0.00)              | 19 (1.00)          | 0 (0.00)             |                                  |
| Ouyen VIC        | Sep-14          | -35.00°  | 142.31°   | Canola                   | 28            | 1 (0.04)              | 27 (0.96)          | 0 (0.00)             |                                  |
| Robinvale VIC    | Sep-14          | -34.81°  | 142.94°   | Canola                   | 16            | 0 (0.00)              | 16 (1.00)          | 0 (0.00)             |                                  |
| Werribee VIC     | Oct-14          | -37.94°  | 144.73°   | Cauliflower              | 16            | 0 (0.00)              | 16 (1.00)          | 0 (0.00)             |                                  |
| Werribee VIC     | Nov-15          | -37.94°  | 144.73°   | Cauliflower              | 16            | 0 (0.00)              | 16 (1.00)          | 0 (0.00)             |                                  |
| Yanac VIC        | Sep-14          | -36.06°  | 141.25°   | Canola                   | 17            | 0 (0.00)              | 17 (1.00)          | 0 (0.00)             |                                  |
| Boyup Brook WA   | Sep-14          | -33.64°  | 116.40°   | Canola                   | 26            | 2 (0.08)              | 24 (0.92)          | 0 (0.00)             |                                  |
| Dalwallinu WA    | Sep-15          | -30.28°  | 116.66°   | Canola                   | 20            | 0 (0.00)              | 20 (1.00)          | 0 (0.00)             |                                  |
| Dalyup WA        | Oct-15          | -33.72°  | 121.64°   | Wild radish              | 22            | 3 (0.14)              | 19 (0.86)          | 0 (0.00)             |                                  |
| Esperance WA     | Sep-14          | -33.29°  | 121.76°   | Canola                   | 23            | 8 (0.35)              | 15 (0.65)          | 1 (0.07)             |                                  |
| Esperance WA     | Oct-15          | -33.79°  | 122.13°   | Canola                   | 16            | 0 (0.00)              | 16 (1.00)          | 0 (0.00)             |                                  |
| Gingin WA        | Dec-14          | -31.28°  | 115.65°   | Red cabbage              | 23            | 0 (0.00)              | 23 (1.00)          | 1 (0.04)             |                                  |
| Kalannie WA      | Sep-15          | -30.00°  | 117.25°   | Canola                   | 18            | 0 (0.00)              | 18 (1.00)          | 0 (0.00)             |                                  |
| Manjimup WA      | Dec-14          | -34.18°  | 116.23°   | Chinese cabbage          | 17            | 0 (0.00)              | 17 (1.00)          | 0 (0.00)             |                                  |
| Manjimup WA      | Nov-15          | -34.18°  | 116.23°   | Vegetables               | 13            | 0 (0.00)              | 13 (1.00)          | 0 (0.00)             |                                  |
| Narrogin WA      | Oct-15          | -32.95°  | 117.32°   | Wild radish, Wild canola | 15            | 0 (0.00)              | 15 (1.00)          | 0 (0.00)             |                                  |
| Narrogin WA      | Oct-15          | -32.96°  | 117.33°   | Canola                   | 32            | 0 (0.00)              | 32 (1.00)          | 0 (0.00)             |                                  |
| Walkaway WA      | Sep-14          | -28.94°  | 114.83°   | Canola                   | 19            | 0 (0.00)              | 19 (1.00)          | 0 (0.00)             |                                  |
| Walkaway WA      | Sep-14          | -28.16°  | 114.63°   | Canola                   | 16            | 0 (0.00)              | 16 (1.00)          | 0 (0.00)             |                                  |
| <b>Total</b>     |                 |          |           |                          | <b>1447</b>   | <b>147 (0.10)</b>     | <b>1300 (0.90)</b> | <b>19 (0.01)</b>     |                                  |

Table 2: Number and frequency ( $f$ ) of *P. australiana* in *Plutella* collections from different Australian states and brassica host types.

| Group                            | No. collection locations | No. ( $f$ ) locations <i>P. aus</i> | No. individuals genotyped | No. ( $f$ ) <i>P. aus</i> |
|----------------------------------|--------------------------|-------------------------------------|---------------------------|---------------------------|
| <b><i>Australian state</i></b>   |                          |                                     |                           |                           |
| New South Wales (NSW)            | 11                       | 8 (0.73)                            | 244                       | 100 (0.41)                |
| Queensland (QLD)                 | 7                        | 2 (0.29)                            | 138                       | 18 (0.13)                 |
| Western Australia (WA)           | 13                       | 3 (0.23)                            | 260                       | 13 (0.05)                 |
| South Australia (SA)             | 35                       | 6 (0.17)                            | 639                       | 15 (0.02)                 |
| Victoria (VIC)                   | 6                        | 1 (0.17)                            | 112                       | 1 (0.01)                  |
| Tasmania (TAS)                   | 3                        | 0 (0.00)                            | 54                        | 0 (0.00)                  |
| <b><i>Brassica host type</i></b> |                          |                                     |                           |                           |
| Wild brassicas                   | 17                       | 5 (0.29)                            | 268                       | 50 (0.19)                 |
| Canola                           | 39                       | 14 (0.36)                           | 848                       | 93 (0.11)                 |
| Vegetables                       | 16                       | 1 (0.06)                            | 287                       | 4 (0.01)                  |
| forage                           | 3                        | 0 (0.00)                            | 44                        | 0 (0.00)                  |

Table 3: Population statistics for variant and invariant sites for sympatric populations of *P. australiana* (*P. aus*) and *P. xylostella* (*P. x*) from five locations. Statistics presented include population means for the number of individuals genotyped per locus ( $n$ ), observed heterozygosity ( $H_o$ ), gene diversity ( $H_s$ ) and Nei's inbreeding coefficient,  $F_{IS}$ .

| Population    | Species       | $n$  | Sites   | Site depth | SNPs | Indels | Private sites | $H_o$ | $H_s$ | $F_{IS}$ |
|---------------|---------------|------|---------|------------|------|--------|---------------|-------|-------|----------|
| Boomi NSW     | <i>P. aus</i> | 11.0 | 280 250 | 40         | 7356 | 1157   | 215           | 0.013 | 0.015 | 0.091    |
|               | <i>P. x</i>   | 9.4  | 286 741 | 41         | 4431 | 568    | 30            | 0.009 | 0.010 | 0.041    |
| Calca SA      | <i>P. aus</i> | 8.7  | 264 486 | 30         | 6771 | 1030   | 212           | 0.014 | 0.015 | 0.059    |
|               | <i>P. x</i>   | 9.2  | 279 935 | 44         | 4354 | 576    | 43            | 0.010 | 0.011 | 0.009    |
| Esperance WA  | <i>P. aus</i> | 4.5  | 272 426 | 28         | 6676 | 1037   | 214           | 0.016 | 0.015 | -0.032   |
|               | <i>P. x</i>   | 11.0 | 278 874 | 35         | 4149 | 538    | 23            | 0.010 | 0.010 | 0.020    |
| Gilgandra NSW | <i>P. aus</i> | 15.6 | 280 533 | 39         | 7311 | 1131   | 216           | 0.014 | 0.015 | 0.080    |
|               | <i>P. x</i>   | 1.9  | 281 509 | 42         | 4256 | 526    | 28            | 0.009 | 0.009 | -0.054   |
| Goulburn NSW  | <i>P. aus</i> | 6.8  | 259 152 | 29         | 6607 | 1009   | 193           | 0.013 | 0.015 | 0.060    |
|               | <i>P. x</i>   | 12.8 | 278 253 | 36         | 4156 | 530    | 26            | 0.009 | 0.010 | 0.053    |

Table 4: Pairwise comparisons of Weir and Cockerham's (1984)  $F_{ST}$  (below diagonal) and geographic distance in kilometres (above diagonal) among populations of *P. australiana* from five locations.

|           | Boomi   | Calca   | Esperance | Gilgandra | Goulburn |
|-----------|---------|---------|-----------|-----------|----------|
| Boomi     | –       | 1555    | 2714      | 341       | 677      |
| Calca     | -0.0033 | –       | 1167      | 1365      | 1434     |
| Esperance | 0.0051  | 0.0028  | –         | 2531      | 2572     |
| Gilgandra | 0.0001  | 0.0045  | 0.0000    | –         | 364      |
| Goulburn  | -0.0015 | -0.0007 | 0.0048    | 0.0003    | –        |

Table 5: Log-logistic regression statistics for dose-response bioassays on *P. australiana* (*P. aus*) and *P. xylostella* (*P.x*) field strains and the *P. xylostella* (S) reference strain exposed to four commercial insecticides. Statistics presented include the number of insects tested (*n*),  $LC_{50}$  and  $LC_{99}$  estimates with 95% confidence limits, resistance ratios (*RR*) at each *LC* level, and ratios of the commercial field doses to the  $LC_{99}$  estimates (Field dose ratio).

| Product     | Strain          | <i>n</i> | Slope (SE)    | $LC_{50}$ (95% CL)<br>[mg L <sup>-1</sup> a.i.] | $RR_{LC50}$ | $LC_{99}$ (95% CL)<br>[mg L <sup>-1</sup> a.i.] | $RR_{LC99}$ | Field dose ratio |
|-------------|-----------------|----------|---------------|-------------------------------------------------|-------------|-------------------------------------------------|-------------|------------------|
| Coragen     | <i>P. aus</i>   | 320      | 2.016 ± 0.236 | 0.028 (0.023–0.034)                             | 0.45        | 0.276 (0.161–0.474)                             | 0.22        | 72.53            |
|             | <i>P. x</i>     | 322      | 1.363 ± 0.149 | 0.524 (0.411–0.667)                             | 8.26        | 15.235 (7.374–31.479)                           | 11.88       | 1.31             |
|             | <i>P. x</i> (S) | 323      | 1.528 ± 0.165 | 0.063 (0.051–0.079)                             | 1.00        | 1.282 (0.666–2.47)                              | 1.00        | 15.60            |
| Dominex     | <i>P. aus</i>   | 320      | 1.078 ± 0.117 | 0.032 (0.024–0.042)                             | 0.13        | 2.267 (0.92–5.583)                              | 0.16        | 17.65            |
|             | <i>P. x</i>     | 320      | 1.292 ± 0.146 | 9.792 (7.563–12.679)                            | 41.38       | 343.317 (158.25–744.816)                        | 24.85       | 0.12             |
|             | <i>P. x</i> (S) | 320      | 1.130 ± 0.118 | 0.237 (0.182–0.308)                             | 1.00        | 13.815 (5.685–33.574)                           | 1.00        | 2.90             |
| Proclaim    | <i>P. aus</i>   | 320      | 2.073 ± 0.235 | 0.012 (0.01–0.015)                              | 0.68        | 0.111 (0.066–0.186)                             | 0.39        | 119.40           |
|             | <i>P. x</i>     | 320      | 1.254 ± 0.146 | 0.073 (0.056–0.096)                             | 4.15        | 2.868 (1.282–6.415)                             | 10.04       | 4.60             |
|             | <i>P. x</i> (S) | 320      | 1.652 ± 0.181 | 0.018 (0.014–0.022)                             | 1.00        | 0.286 (0.153–0.532)                             | 1.00        | 46.20            |
| Success Neo | <i>P. aus</i>   | 320      | 2.087 ± 0.293 | 0.011 (0.009–0.014)                             | 0.14        | 0.101 (0.056–0.184)                             | 0.14        | 474.63           |
|             | <i>P. x</i>     | 320      | 1.766 ± 0.196 | 0.242 (0.197–0.297)                             | 2.94        | 3.266 (1.805–5.912)                             | 4.65        | 14.69            |
|             | <i>P. x</i> (S) | 321      | 2.143 ± 0.255 | 0.082 (0.068–0.099)                             | 1.00        | 0.703 (0.417–1.184)                             | 1.00        | 68.28            |

Table 6: Fecundity of intra-species and reciprocal inter-species single pair crosses of *P. australiana* (*P. aus*) and *P. xylostella* (*P.x*). Presented are the number and proportion in parentheses of replicates that produced eggs and adult offspring, and the mean ± standard error of the mean number of eggs and adult offspring per replicate.

| Cross (♀ x ♂)                     | No. replicates | No. reps eggs | No. reps adults | Mean ± SEM no. eggs | Mean ± SEM no. adults |
|-----------------------------------|----------------|---------------|-----------------|---------------------|-----------------------|
| <i>P. aus</i> ♀ x <i>P. aus</i> ♂ | 42             | 37 (0.88)     | 34 (0.81)       | 40.86 ± 5.33        | 9.66 ± 1.70           |
| <i>P.x</i> ♀ x <i>P.x</i> ♂       | 63             | 59 (0.94)     | 59 (0.94)       | 83.82 ± 10.61       | 24.28 ± 3.27          |
| <i>P. aus</i> ♀ x <i>P.x</i> ♂    | 76             | 49 (0.65)     | 16 (0.21)       | 18.43 ± 3.02        | 1.17 ± 0.33           |
| <i>P.x</i> ♀ x <i>P. aus</i> ♂    | 85             | 62 (0.73)     | 3 (0.04)        | 15.16 ± 2.37        | 0.06 ± 0.03           |

Table 7: Fecundity of hybrid F1 crosses and back-crosses. Presented are the numbers and proportion in parentheses of replicates producing eggs and adult offspring, and the mean ± standard error of the mean numbers of eggs and adults offspring per replicate. A dash denotes an absence of count data.

| Cross (♀ x ♂)                                                           | No. replicates | No. reps eggs | No. reps adults | Mean ± SEM no. eggs | Mean ± SEM no. adults |
|-------------------------------------------------------------------------|----------------|---------------|-----------------|---------------------|-----------------------|
| F0 <i>P. aus</i> ♀ source                                               |                |               |                 |                     |                       |
| ( <i>P. aus</i> ♀ x <i>P.x</i> ♂)♀ x ( <i>P. aus</i> ♀ x <i>P.x</i> ♂)♂ | 4              | 4 (1.00)      | 2 (0.50)        | 66.00 ± 60.00       | –                     |
| ( <i>P. aus</i> ♀ x <i>P.x</i> ♂)♀ x <i>P. aus</i> ♂                    | 7              | 7 (1.00)      | 0 (0.00)        | 20.33 ± 11.86       | 0.00 ± 0.00           |
| <i>P. aus</i> ♀ x ( <i>P. aus</i> ♀ x <i>P.x</i> ♂)♂                    | 9              | 5 (0.56)      | 2 (0.22)        | 6.38 ± 3.54         | 0.22 ± 0.44           |
| ( <i>P. aus</i> ♀ x <i>P.x</i> ♂)♀ x <i>P.x</i> ♂                       | 4              | 4 (1.00)      | 0 (0.00)        | 39.00 ± 19.00       | 0.00 ± 0.00           |
| <i>P.x</i> ♀ x ( <i>P. aus</i> ♀ x <i>P.x</i> ♂)♂                       | 15             | 15 (1.00)     | 4 (0.27)        | 36.75 ± 3.21        | 0.33 ± 0.62           |
| F0 <i>P.x</i> ♀ source                                                  |                |               |                 |                     |                       |
| ( <i>P.x</i> ♀ x <i>P. aus</i> ♂)♀ x ( <i>P.x</i> ♀ x <i>P. aus</i> ♂)♂ | 6              | 5 (0.83)      | 4 (0.67)        | 74.50 ± 22.79       | 6.17 ± 5.27           |
| ( <i>P.x</i> ♀ x <i>P. aus</i> ♂)♀ x <i>P. aus</i> ♂                    | 1              | 0 (0.00)      | 0 (0.00)        | 0.00                | 0.00                  |
